# Supplementary material for: Targeted exon skipping of NF1 exon 17 as a therapeutic for neurofibromatosis type I
Source: PubMed Central journal article supplement — Mol Ther Nucleic Acids. 2022 Mar 15;28:261–78. doi: 10.1016/j.omtn.2022.03.011 (PMC8983316; doi:10.1016/j.omtn.2022.03.011), 2022-03-15
Supplement: mmc1.pdf [file mmc1.pdf]

**Supplemental information**

**Targeted exon skipping of *NF1* exon 17  
as a therapeutic for neurofibromatosis type I**

**André Leier, Marc Moore, Hui Liu, Michael Daniel, Alexis M. Hyde, Ludwine Messiaen, Bruce R. Korf, Jamuna Selvakumaran, Lukasz Ciszewski, Laura Lambert, Jeremy Foote, Margaret R. Wallace, Robert A. Kesterson, George Dickson, Linda Popplewell, and Deeann Wallis**

Supplemental Table 1A: Exon Deletions and Reported Phenotypes

|                     |                 |                |                                           | Reported phenotypes                                                                                                                                              |                                                                                                                                                                                                               |
|---------------------|-----------------|----------------|-------------------------------------------|------------------------------------------------------------------------------------------------------------------------------------------------------------------|---------------------------------------------------------------------------------------------------------------------------------------------------------------------------------------------------------------|
| Exon No. (Original) | Exon No. (LOVD) | RNA change     | Protein change                            | Publications (reporting exon deletion but not necessarily details on phenotype)                                                                                  | Phenotype                                                                                                                                                                                                     |
| 1                   | 1               | r.1_60del      | Start Codon at End of Exon 2              |                                                                                                                                                                  |                                                                                                                                                                                                               |
| 2                   | 2               | r.61_204del    | p.Leu21_Met68del                          | Fahsold et al. 2000; Ars et al. 2003; Hsiao et al. 2015                                                                                                          | CALs, "symptomatic paravertebral masses from cervical to sacral region", "one symptomatic internal neurofibroma infiltrating the kidney", cutaneous neurofibromas, congenital tibial dysplasia (Hsiao et al.) |
| 3                   | 3               | r.205_288del   | p.Arg69_Gly96del                          | Ars et al. 2003; Liu et al. 2003; Pros et al. 2008; Sabbagh et al. 2013; Xu et al. 2014; Hsiao et al. 2015; Zhang et al. 2015                                    | "typical phenotypes of NF1" (Liu et al.); CALs, subcutaneous neurofibromas, plexiform neurofibromas, Lisch nodules, speaking problems (Zhang et al.)                                                          |
| 4a                  | 4               | r.289_479del   | p.Gln97fs                                 | De Luca et al. 2007; Wimmer et al. 2007; Pros et al. 2008; Sabbagh et al. 2013; Hsiao et al. 2015                                                                | CALs; Lisch nodules; neurofibromas; gangliofibromas; optical pathway gliomas                                                                                                                                  |
| 4b                  | 5               | r.480_586del   | p.Leu161fs                                | Ars et al. 2000; Fahsold et al. 2000; Ars et al. 2003; Zatkova et al. 2004; Hsiao et al. 2015                                                                    | CALs, cutaneous neurofibromas, optic nerve glioma, juvenile pilocytic astrocytoma (Hsiao et al. 2015)                                                                                                         |
| 4c                  | 6               | r.587_654del   | p.Glu196fs                                | Sabbagh et al. 2013                                                                                                                                              | reported as pathogenic                                                                                                                                                                                        |
| 5                   | 7               | r.655_730del   | p.Ala219fs                                | Sabbagh et al. 2013                                                                                                                                              | reported as pathogenic                                                                                                                                                                                        |
| 6                   | 8               | r.731_888del   | p.Cys245fs                                | Fahsold et al. 2000                                                                                                                                              | reported as pathogenic                                                                                                                                                                                        |
| 7                   | 9               | r.889_1062del  | p.Lys297_Lys354del                        | Hoffmeyer et al. 1998; Messiaen et al. 2000; Fahsold et al. 2000; Ars et al. 2003; Zatkova et al. 2004; Xu et al. 2014                                           | Scoliosis (IVS7+1G>A); CALs and dermal neurofibromas (c.910C>T)                                                                                                                                               |
| 8                   | 10              | r.1063_1185del | p.Asn355_Lys395del                        | Fahsold et al. 2000; Ars et al. 2003; Sabbagh et al. 2013; Xu et al. 2014                                                                                        | reported as pathogenic                                                                                                                                                                                        |
| 9                   | 11              | r.1186_1260del | p.Ile396_Asn420del                        | Ars et al. 2003                                                                                                                                                  | reported as pathogenic                                                                                                                                                                                        |
| 10a                 | 12              | r.1261_1392del | p.Ser421_Pro464del                        | De Luca et al. 2004; De Luca et al. 2007; Sabbagh et al. 2013                                                                                                    | CALs, nodular neurofibromas, cutaneous neurofibromas, plexiform neurofibromas, Lisch nodules, scoliosis, schwannoma, thyroid nodules, Becker naevus                                                           |
| 10b                 | 13              | r.1393_1527del | p.Ser465_Cys509del                        | Ars et al. 1999; Ars et al. 2003; Wimmer et al. 2007; Pros et al. 2008; Sabbagh et al. 2013; Hsiao et al. 2015; Zhang et al. 2015                                | Plexiform neurofibromas (IVS10b+1G>A); Scoliosis (IVS10b+1G>A)                                                                                                                                                |
| 10c                 | 14              | r.1528_1641del | p.Asn510_Glu547del                        | Hsiao et al. 2015; Zhang et al. 2015                                                                                                                             | CALs                                                                                                                                                                                                          |
| 11                  | 15              | r.1642_1721del | p.Ala548fs                                | Purandare et al. 1994; Fahsold et al. 2000; Ars et al. 2003; De Luca et al. 2007; Pros et al. 2008; Sabbagh et al. 2013; Xu et al. 2014                          | Learning disability, cutaneous neurofibromas, CALs, acoustic neurinoma, pectus excavatum                                                                                                                      |
| 12a                 | 16              | r.1722_1845del | Skipping this exon leads to a frameshift. |                                                                                                                                                                  |                                                                                                                                                                                                               |
| 12b                 | 17              | r.1846_2001del |                                           |                                                                                                                                                                  |                                                                                                                                                                                                               |
| 13                  | 18              | r.2002_2251del | p.?                                       | Ars et al. 2003                                                                                                                                                  | reported as pathogenic                                                                                                                                                                                        |
| 14                  | 19              | r.2252_2325del | p.Arg752fs                                | Maynard et al. 1997; Origone et al. 2003; Sabbagh et al. 2013; Nemethova et al. 2013                                                                             | premature skeletal development; hamartomas in the brain; mental retardation; CALs; Lisch nodules; optical pathway glioma                                                                                      |
| 15                  | 20              | r.2326_2409del |                                           | Ars et al. 2003; Xu et al. 2014                                                                                                                                  | reported as pathogenic                                                                                                                                                                                        |
| 16                  | 21              | r.2410_2850del | p.Ala804_Gln950del                        | Xu et al. 2014; Hsiao et al. 2015                                                                                                                                | reported as pathogenic                                                                                                                                                                                        |
| 17                  | 22              | r.2851_2990del | p.Leu952fs                                | Ars et al. 2003; Jeong et al. 2006; Wimmer et al. 2007; Sabbagh et al. 2013                                                                                      | Plexiform neurofibromas (IVS17+2insT)                                                                                                                                                                         |
| 18                  | 23              | r.2991_3113del | p.Tyr998_Arg1038del                       | Purandare et al. 1995; Osborn and Upadhyaya 1999; Ars et al. 2000; Kluwe et al., 2002; Ars et al. 2003; Pros et al. 2008; Sabbagh et al. 2013; Zhang et al. 2015 | Plexiform neurofibromas; Hamartomas in the brain; CALs; (IVS18+5G>C)                                                                                                                                          |
| 19a                 | 24              | r.3114_3197del | p.?                                       | Ars et al. 2003; Xu et al. 2014                                                                                                                                  | reported as pathogenic                                                                                                                                                                                        |
| 19b                 | 25              | r.3198_3314del |                                           |                                                                                                                                                                  |                                                                                                                                                                                                               |
| 20                  | 26              | r.3315_3496del | p.Tyr1106fs                               | Sabbagh et al. 2013; Xu et al. 2014                                                                                                                              | reported as pathogenic                                                                                                                                                                                        |
| 21                  | 27              | r.3497_3708del | p.Gly1166fs                               | Sabbagh et al. 2013; Xu et al. 2014                                                                                                                              | reported as pathogenic                                                                                                                                                                                        |
| 22                  | 28              | r.3709_3870del | p.Asp1237Valfs                            | Hsiao et al. 2015                                                                                                                                                | reported as pathogenic                                                                                                                                                                                        |
| 23.1                | 29              | r.3871_3974del | p.Tyr1292fs                               | Upadhyaya 1997                                                                                                                                                   | reported as pathogenic                                                                                                                                                                                        |
| 23.2                | 30              | r.3975_4110del | p.Leu1326fs                               | Hsiao et al. 2015                                                                                                                                                | reported as pathogenic                                                                                                                                                                                        |

|     |    |                |                                           |                                                                                                                                                                                                                                                       |                                                                                                      |
|-----|----|----------------|-------------------------------------------|-------------------------------------------------------------------------------------------------------------------------------------------------------------------------------------------------------------------------------------------------------|------------------------------------------------------------------------------------------------------|
| 24  | 32 | r.4111_4269del | p.Val1371_Lys1423del                      | Nemethova et al. 2013                                                                                                                                                                                                                                 | CAL, mental retardation, deafness (c.4268A>G)                                                        |
| 25  | 33 | r.4270_4367del | p.Ile1424fs                               | Ars et al. 2003; Pros et al. 2008; Sabbagh et al. 2013; Xu et al. 2014                                                                                                                                                                                | reported as pathogenic                                                                               |
| 26  | 34 | r.4368_4514del | p.Phe1457_Arg1505del                      | Hsiao et al. 2015                                                                                                                                                                                                                                     | CALs, scoliosis, cutaneous neurofibromas                                                             |
| 27a | 35 | r.4515_4661del | p.Asp1506_Arg1554del                      | Ars et al. 2003; Pros et al. 2008                                                                                                                                                                                                                     | reported as pathogenic                                                                               |
| 27b | 36 | r.4662_4772del | p.His1555_Arg1591del                      | Hsiao et al. 2015                                                                                                                                                                                                                                     | CALs, Lisch nodules, cutaneous neurofibromas, spinal neurofibroma                                    |
| 28  | 37 | r.4773_5205del | p.Phe1592fs                               | Sabbagh et al. 2013; Zhang et al. 2015                                                                                                                                                                                                                | Zhang et al.: Various types of neurofibromas in one patient and CALs (but no NFs) in another patient |
| 29  | 38 | r.5206_5546del | p.Gly1737fs                               | Peters et al. 1999; Fahsold et al. 2000; Girondon-Boulandet et al. 2000; Messiaen et al. 2000; Ars et al. 2003; Sabbagh et al. 2013; Xu et al. 2014; Zhang et al. 2015                                                                                | CALs and dermal neurofibromas (c.5546G>A); CALs, Lisch nodules (c.5206-2A>G); Spinal tumors          |
| 30  | 39 | r.5547_5749del | p.Ser1850fs                               | Purandare et al. 1994; Zatkova et al. 2004; Sabbagh et al. 2013; Hsiao et al. 2015                                                                                                                                                                    | reported as pathogenic                                                                               |
| 31  | 40 | r.5750_5943del | p.Ser1917fs                               | Sabbagh et al. 2013; Hsiao et al. 2015                                                                                                                                                                                                                | reported as pathogenic                                                                               |
| 32  | 41 | r.5944_6084del |                                           |                                                                                                                                                                                                                                                       |                                                                                                      |
| 33  | 42 | r.6085_6364del | p.Val2029fs                               | Sabbagh et al. 2013; Zhang et al. 2015                                                                                                                                                                                                                | CALs, Gastrointestinal stromal tumor, cutaneous and subcutaneous neurofibromas (Zhang et al.)        |
| 34  | 43 | r.6365_6579del | p.?                                       | Ars et al. 2003; De Luca et al. 2007; Xu et al. 2014                                                                                                                                                                                                  | CALS, cutaneous neurofibromas                                                                        |
| 35  | 44 | r.6580_6641del | p.Ala2194fs                               | Fahsold et al. 2000; Ars et al. 2003; De Luca et al. 2004; De Luca et al. 2007; Nemethova et al. 2013; Sabbagh et al. 2013                                                                                                                            | CALs; Lisch nodules; cutaneous neurofibromas; optic glioma                                           |
| 36  | 45 | r.6642_6756del | p.Phe2215fs                               | Fahsold et al. 2000; Ars et al. 2003; De Luca et al. 2003; De Luca et al. 2007; Pros et al. 2008; Sabbagh et al. 2013                                                                                                                                 | CALs, dermal neurofibromas, nodular neurofibromas, plexiform neurofibromas                           |
| 37  | 46 | r.6757_6858del | p.Ala2253_Lys2286del                      | Robinson et al. 1995; Upadhyaya et al. 1996; Messiaen et al. 1997; Hoffmeyer et al. 1998; Fahsold et al. 2000; Messiaen et al. 2000; Ars et al. 2003; Zatkova et al. 2004; Wimmer et al. 2007; Skoko et al. 2008; Sabbagh et al. 2013; Xu et al. 2014 | CALs and dermal neurofibromas (c.6792C>A); Scoliosis (IVS37+2T>G)                                    |
| 38  | 47 | r.6859_6999del |                                           | Pros et al. 2008                                                                                                                                                                                                                                      | reported as pathogenic                                                                               |
| 39  | 48 | r.7000_7126del | p.Ser2334fs                               | Sabbagh et al. 2013                                                                                                                                                                                                                                   | reported as pathogenic                                                                               |
| 40  | 49 | r.7127_7258del | p.Gly2376_Ala2419del                      | Griffiths et al. 2007; Pros et al. 2008; Sabbagh et al. 2013                                                                                                                                                                                          | "met NIH [diagnostic] criteria for NF1"                                                              |
| 41  | 50 | r.7259_7394del | Skipping this exon leads to a frameshift. |                                                                                                                                                                                                                                                       |                                                                                                      |
| 42  | 51 | r.7395_7552del | p.Thr2466fs                               | De Smet et al. 2002; Brems et al. 2009; Hsiao et al. 2015                                                                                                                                                                                             | NF1-associated glomus tumor; CALs, cutaneous neurofibromas, pseudarthrosis (Hsiao et al.)            |
| 43  | 52 | r.7553_7675del |                                           |                                                                                                                                                                                                                                                       |                                                                                                      |
| 44  | 53 | r.7676_7806del | p.?                                       | Ars et al. 2003; Xu et al. 2014                                                                                                                                                                                                                       | reported as pathogenic                                                                               |
| 45  | 54 | r.7807_7907del | p.Thr2604fs                               | De Luca et al. 2004; Sabbagh et al. 2013                                                                                                                                                                                                              | CALs (reported for c.7907+5G>A); all others reported as pathogenic                                   |
| 46  | 55 | r.7908_8050del | p.Val2636fs                               | Sabbagh et al. 2013; Hsiao et al. 2015                                                                                                                                                                                                                | reported as pathogenic                                                                               |
| 47  | 56 | r.8051_8097del | Skipping this exon leads to a frameshift. |                                                                                                                                                                                                                                                       |                                                                                                      |
| 48  | 57 | r.8098_8314del | p.?                                       | Xu et al. 2014                                                                                                                                                                                                                                        | reported as pathogenic                                                                               |
| 49  | 58 | r.8315_8454del | Skipping this exon leads to a frameshift. |                                                                                                                                                                                                                                                       |                                                                                                      |

**Supplemental Table 1B: Exon Deletions and LOVD entries**  
**LOVD 3.0 Build 21 November 2018**

| Exon deleted | RNA change     | Protein change         | DB-ID      | Origin         | LOVD Individual ID | LOVD link                                                                                                                                 | Publication         |  |  |  |
|--------------|----------------|------------------------|------------|----------------|--------------------|-------------------------------------------------------------------------------------------------------------------------------------------|---------------------|--|--|--|
| 2            | r.61_204del    | p.Leu21_Met68del       | NF1_001689 | Germline       | 131376             | <a href="https://databases.lovd.nl/shared/variants/0000221390#00014502">https://databases.lovd.nl/shared/variants/0000221390#00014502</a> |                     |  |  |  |
|              |                |                        | NF1_001740 | Germline       | 131428             | <a href="https://databases.lovd.nl/shared/variants/0000221442#00014502">https://databases.lovd.nl/shared/variants/0000221442#00014502</a> | Hsiao et al. 2015   |  |  |  |
|              |                |                        | NF1_001740 | De Novo        | 131429             | <a href="https://databases.lovd.nl/shared/variants/0000221443#00014502">https://databases.lovd.nl/shared/variants/0000221443#00014502</a> | Hsiao et al. 2015   |  |  |  |
|              |                |                        | NF1_001740 | Germline       | 131430             | <a href="https://databases.lovd.nl/shared/variants/0000221444#00014502">https://databases.lovd.nl/shared/variants/0000221444#00014502</a> | Hsiao et al. 2015   |  |  |  |
|              |                |                        | NF1_001741 | Germline       | 131431             | <a href="https://databases.lovd.nl/shared/variants/0000221445#00014502">https://databases.lovd.nl/shared/variants/0000221445#00014502</a> | Hsiao et al. 2015   |  |  |  |
|              |                |                        | NF1_002236 | Unknown        | 64581              | <a href="https://databases.lovd.nl/shared/variants/0000096129#00014502">https://databases.lovd.nl/shared/variants/0000096129#00014502</a> |                     |  |  |  |
| 3            | r.205_288del   | p.Arg69_Gly96del       | NF1_002237 | Unknown        | 64580              | <a href="https://databases.lovd.nl/shared/variants/0000096128#00014502">https://databases.lovd.nl/shared/variants/0000096128#00014502</a> |                     |  |  |  |
|              |                |                        | NF1_000267 | Germline       | 129034             | <a href="https://databases.lovd.nl/shared/variants/0000219046#00014502">https://databases.lovd.nl/shared/variants/0000219046#00014502</a> |                     |  |  |  |
|              |                |                        | NF1_000267 | Unknown        | 130383             | <a href="https://databases.lovd.nl/shared/variants/0000220395#00014502">https://databases.lovd.nl/shared/variants/0000220395#00014502</a> | Liu et al. 2003     |  |  |  |
|              |                |                        | NF1_000267 | Unknown        | 130981             | <a href="https://databases.lovd.nl/shared/variants/0000220995#00014502">https://databases.lovd.nl/shared/variants/0000220995#00014502</a> |                     |  |  |  |
|              |                |                        | NF1_001745 | De Novo        | 131435             | <a href="https://databases.lovd.nl/shared/variants/0000221449#00014502">https://databases.lovd.nl/shared/variants/0000221449#00014502</a> | Hsiao et al. 2015   |  |  |  |
|              |                |                        | NF1_001690 | Germline       | 131377             | <a href="https://databases.lovd.nl/shared/variants/0000221391#00014502">https://databases.lovd.nl/shared/variants/0000221391#00014502</a> |                     |  |  |  |
| 4            | r.289_479del   | p.Gln97fs              | NF1_001484 | Unknown        | 131042             | <a href="https://databases.lovd.nl/shared/variants/0000221056#00014502">https://databases.lovd.nl/shared/variants/0000221056#00014502</a> | Pros et al. 2008    |  |  |  |
|              |                |                        | NF1_001484 | Germline       | 132905             | <a href="https://databases.lovd.nl/shared/variants/0000223167#00014502">https://databases.lovd.nl/shared/variants/0000223167#00014502</a> | Pros et al. 2008    |  |  |  |
|              |                |                        | NF1_001747 | De Novo        | 131437             | <a href="https://databases.lovd.nl/shared/variants/0000221451#00014502">https://databases.lovd.nl/shared/variants/0000221451#00014502</a> | Hsiao et al. 2015   |  |  |  |
|              |                |                        | NF1_001489 | Unknown        | 131047             | <a href="https://databases.lovd.nl/shared/variants/0000221061#00014502">https://databases.lovd.nl/shared/variants/0000221061#00014502</a> | Pros et al. 2008    |  |  |  |
|              |                |                        | NF1_001143 | Unknown        | 130384             | <a href="https://databases.lovd.nl/shared/variants/0000220396#00014502">https://databases.lovd.nl/shared/variants/0000220396#00014502</a> | Sabbagh et al. 2013 |  |  |  |
|              |                |                        | NF1_001147 | Unknown        | 130388             | <a href="https://databases.lovd.nl/shared/variants/0000220400#00014502">https://databases.lovd.nl/shared/variants/0000220400#00014502</a> | Wimmer et al. 2007  |  |  |  |
| 5            | r.480_586del   | p.Leu161fs             | NF1_001751 | De Novo        | 131441             | <a href="https://databases.lovd.nl/shared/variants/0000221455#00014502">https://databases.lovd.nl/shared/variants/0000221455#00014502</a> | Hsiao et al. 2015   |  |  |  |
|              |                |                        | NF1_000717 | Germline       | 129793             | <a href="https://databases.lovd.nl/shared/variants/0000219805#00014502">https://databases.lovd.nl/shared/variants/0000219805#00014502</a> | Fahsold et al. 2000 |  |  |  |
|              |                |                        | NF1_000717 | Unknown        | 130394             | <a href="https://databases.lovd.nl/shared/variants/0000220406#00014502">https://databases.lovd.nl/shared/variants/0000220406#00014502</a> | Fahsold et al. 2000 |  |  |  |
|              |                |                        | NF1_000718 | Unknown        | 64318              | <a href="https://databases.lovd.nl/shared/variants/0000095856#00014502">https://databases.lovd.nl/shared/variants/0000095856#00014502</a> |                     |  |  |  |
|              |                |                        | NF1_000718 | Unknown        | 129794             | <a href="https://databases.lovd.nl/shared/variants/0000219806#00014502">https://databases.lovd.nl/shared/variants/0000219806#00014502</a> | Ars et al. 2000     |  |  |  |
|              |                |                        | NF1_000718 | Unknown        | 129795             | <a href="https://databases.lovd.nl/shared/variants/0000219807#00014502">https://databases.lovd.nl/shared/variants/0000219807#00014502</a> | Ars et al. 2000     |  |  |  |
| 6            | r.587_654del   | p.Glu196fs             | NF1_000718 | Unknown        | 130391             | <a href="https://databases.lovd.nl/shared/variants/0000220403#00014502">https://databases.lovd.nl/shared/variants/0000220403#00014502</a> | Ars et al. 2000     |  |  |  |
|              |                |                        | NF1_001149 | Unknown        | 130413             | <a href="https://databases.lovd.nl/shared/variants/0000220425#00014502">https://databases.lovd.nl/shared/variants/0000220425#00014502</a> | Sabbagh et al. 2013 |  |  |  |
|              |                |                        | NF1_000722 | Unknown        | 129799             | <a href="https://databases.lovd.nl/shared/variants/0000219811#00014502">https://databases.lovd.nl/shared/variants/0000219811#00014502</a> |                     |  |  |  |
|              |                |                        | NF1_000722 | Unknown        | 131049             | <a href="https://databases.lovd.nl/shared/variants/0000221063#00014502">https://databases.lovd.nl/shared/variants/0000221063#00014502</a> |                     |  |  |  |
|              |                |                        | NF1_001707 | De Novo        | 131394             | <a href="https://databases.lovd.nl/shared/variants/0000221408#00014502">https://databases.lovd.nl/shared/variants/0000221408#00014502</a> |                     |  |  |  |
|              |                |                        | NF1_001150 | Unknown        | 130414             | <a href="https://databases.lovd.nl/shared/variants/0000220426#00014502">https://databases.lovd.nl/shared/variants/0000220426#00014502</a> | Sabbagh et al. 2013 |  |  |  |
| 7            | r.655_730del   | p.Ala219fs             | NF1_000941 | De Novo        | 130151             | <a href="https://databases.lovd.nl/shared/variants/0000220163#00014502">https://databases.lovd.nl/shared/variants/0000220163#00014502</a> |                     |  |  |  |
|              |                |                        | NF1_000941 | Unknown        | 130152             | <a href="https://databases.lovd.nl/shared/variants/0000220164#00014502">https://databases.lovd.nl/shared/variants/0000220164#00014502</a> |                     |  |  |  |
| 8            | r.731_888del   | p.Cys245fs             | NF1_000941 | Unknown        | 130422             | <a href="https://databases.lovd.nl/shared/variants/0000220434#00014502">https://databases.lovd.nl/shared/variants/0000220434#00014502</a> | Fahsold et al. 2000 |  |  |  |
| 9            | r.889_1062del  | No entries in LOVD 3.0 |            |                |                    |                                                                                                                                           |                     |  |  |  |
| 10           | r.1063_1185del | p.Asn355_Lys395del     | NF1_001166 | Unknown        | 130441             | <a href="https://databases.lovd.nl/shared/variants/0000220453#00014502">https://databases.lovd.nl/shared/variants/0000220453#00014502</a> | Sabbagh et al. 2013 |  |  |  |
| 11           | r.1186_1260del | No entries in LOVD 3.0 |            |                |                    |                                                                                                                                           |                     |  |  |  |
| 12           | r.1261_1392del | p.Ser421_Pro464del     | NF1_001176 | Unknown        | 130458             | <a href="https://databases.lovd.nl/shared/variants/0000220470#00014502">https://databases.lovd.nl/shared/variants/0000220470#00014502</a> | De Luca et al. 2004 |  |  |  |
| 13           | r.1393_1527del | p.Ser465_Cys509del     | NF1_001176 | Unknown        | 131076             | <a href="https://databases.lovd.nl/shared/variants/0000221090#00014502">https://databases.lovd.nl/shared/variants/0000221090#00014502</a> | De Luca et al. 2004 |  |  |  |
|              |                |                        | NF1_001770 | Unknown        | 131460             | <a href="https://databases.lovd.nl/shared/variants/0000221474#00014502">https://databases.lovd.nl/shared/variants/0000221474#00014502</a> | Hsiao et al. 2015   |  |  |  |
|              |                |                        | NF1_002081 | Unknown        | 64519              | <a href="https://databases.lovd.nl/shared/variants/0000096065#00014502">https://databases.lovd.nl/shared/variants/0000096065#00014502</a> |                     |  |  |  |
|              |                |                        | NF1_000067 | Unknown        | 128708             | <a href="https://databases.lovd.nl/shared/variants/0000218720#00014502">https://databases.lovd.nl/shared/variants/0000218720#00014502</a> |                     |  |  |  |
|              |                |                        | NF1_000067 | Unknown        | 128709             | <a href="https://databases.lovd.nl/shared/variants/0000218721#00014502">https://databases.lovd.nl/shared/variants/0000218721#00014502</a> |                     |  |  |  |
|              |                |                        | NF1_000067 | Unknown        | 128710             | <a href="https://databases.lovd.nl/shared/variants/0000218722#00014502">https://databases.lovd.nl/shared/variants/0000218722#00014502</a> |                     |  |  |  |
|              |                |                        | NF1_000067 | Unknown        | 130469             | <a href="https://databases.lovd.nl/shared/variants/0000220481#00014502">https://databases.lovd.nl/shared/variants/0000220481#00014502</a> | Ars et al. 1999     |  |  |  |
|              |                |                        | NF1_001180 | Unknown        | 130476             | <a href="https://databases.lovd.nl/shared/variants/0000220488#00014502">https://databases.lovd.nl/shared/variants/0000220488#00014502</a> | Pros et al. 2008    |  |  |  |
|              |                |                        | NF1_001180 | Unknown        | 130477             | <a href="https://databases.lovd.nl/shared/variants/0000220489#00014502">https://databases.lovd.nl/shared/variants/0000220489#00014502</a> | Pros et al. 2008    |  |  |  |
|              |                |                        | NF1_001180 | Unknown        | 130478             | <a href="https://databases.lovd.nl/shared/variants/0000220490#00014502">https://databases.lovd.nl/shared/variants/0000220490#00014502</a> | Pros et al. 2008    |  |  |  |
|              |                |                        | NF1_001506 | De Novo        | 64324              | <a href="https://databases.lovd.nl/shared/variants/0000095864#00014502">https://databases.lovd.nl/shared/variants/0000095864#00014502</a> |                     |  |  |  |
|              |                |                        | NF1_001506 | De Novo        | 131081             | <a href="https://databases.lovd.nl/shared/variants/0000221095#00014502">https://databases.lovd.nl/shared/variants/0000221095#00014502</a> |                     |  |  |  |
|              |                |                        | NF1_001181 | Unknown        | 130479             | <a href="https://databases.lovd.nl/shared/variants/0000220491#00014502">https://databases.lovd.nl/shared/variants/0000220491#00014502</a> | Wimmer et al. 2007  |  |  |  |
|              |                |                        | NF1_001773 | Unknown        | 131463             | <a href="https://databases.lovd.nl/shared/variants/0000221477#00014502">https://databases.lovd.nl/shared/variants/0000221477#00014502</a> | Hsiao et al. 2015   |  |  |  |
| 14           | r.1528_1641del | p.Asn510_Glu547del     | NF1_001187 | Unknown        | 130492             | <a href="https://databases.lovd.nl/shared/variants/0000220504#00014502">https://databases.lovd.nl/shared/variants/0000220504#00014502</a> | Sabbagh et al. 2013 |  |  |  |
|              |                |                        | NF1_000099 | Unknown        | 64334              | <a href="https://databases.lovd.nl/shared/variants/0000095874#00014502">https://databases.lovd.nl/shared/variants/0000095874#00014502</a> |                     |  |  |  |
|              |                |                        | NF1_000099 | Unknown        | 128768             | <a href="https://databases.lovd.nl/shared/variants/0000218780#00014502">https://databases.lovd.nl/shared/variants/0000218780#00014502</a> |                     |  |  |  |
|              |                |                        | NF1_000099 | Unknown        | 130497             | <a href="https://databases.lovd.nl/shared/variants/0000220509#00014502">https://databases.lovd.nl/shared/variants/0000220509#00014502</a> | Pros et al. 2008    |  |  |  |
|              |                |                        | NF1_001188 | Unknown        | 130493             | <a href="https://databases.lovd.nl/shared/variants/0000220505#00014502">https://databases.lovd.nl/shared/variants/0000220505#00014502</a> | Sabbagh et al. 2013 |  |  |  |
|              |                |                        | NF1_001189 | Unknown        | 130494             | <a href="https://databases.lovd.nl/shared/variants/0000220506#00014502">https://databases.lovd.nl/shared/variants/0000220506#00014502</a> | Sabbagh et al. 2013 |  |  |  |
|              |                |                        | NF1_001190 | De Novo        | 130498             | <a href="https://databases.lovd.nl/shared/variants/0000220510#00014502">https://databases.lovd.nl/shared/variants/0000220510#00014502</a> | Pros et al. 2008    |  |  |  |
|              |                |                        | NF1_001190 | Unknown        | 131863             | <a href="https://databases.lovd.nl/shared/variants/0000221878#00014502">https://databases.lovd.nl/shared/variants/0000221878#00014502</a> | Cali et al. ??      |  |  |  |
|              |                |                        | 15         | r.1642_1721del | p.Ala548fs         |                                                                                                                                           |                     |  |  |  |
|              |                |                        |            |                |                    |                                                                                                                                           |                     |  |  |  |

|    |                |                        |            |          |        |                                                                                                                                           |                           |
|----|----------------|------------------------|------------|----------|--------|-------------------------------------------------------------------------------------------------------------------------------------------|---------------------------|
|    |                |                        | NF1_000101 | Unknown  | 128770 | <a href="https://databases.lovd.nl/shared/variants/0000218782#00014502">https://databases.lovd.nl/shared/variants/0000218782#00014502</a> | Purandare et al. 1994     |
|    |                |                        | NF1_000101 | Unknown  | 130499 | <a href="https://databases.lovd.nl/shared/variants/0000220511#00014502">https://databases.lovd.nl/shared/variants/0000220511#00014502</a> | Purandare et al. 1994     |
|    |                |                        | NF1_000101 | Unknown  | 130500 | <a href="https://databases.lovd.nl/shared/variants/0000220512#00014502">https://databases.lovd.nl/shared/variants/0000220512#00014502</a> | Purandare et al. 1994     |
|    |                |                        | NF1_000101 | Unknown  | 130501 | <a href="https://databases.lovd.nl/shared/variants/0000220513#00014502">https://databases.lovd.nl/shared/variants/0000220513#00014502</a> | Purandare et al. 1994     |
|    |                |                        | NF1_000101 | De Novo  | 130879 | <a href="https://databases.lovd.nl/shared/variants/0000220893#00014502">https://databases.lovd.nl/shared/variants/0000220893#00014502</a> | Purandare et al. 1994     |
|    |                |                        | NF1_000101 | Unknown  | 131086 | <a href="https://databases.lovd.nl/shared/variants/0000221100#00014502">https://databases.lovd.nl/shared/variants/0000221100#00014502</a> | Purandare et al. 1994     |
|    |                |                        | NF1_000101 | Germline | 132872 | <a href="https://databases.lovd.nl/shared/variants/0000223134#00014502">https://databases.lovd.nl/shared/variants/0000223134#00014502</a> | Purandare et al. 1994     |
| 16 | r.1722_1845del | No entries in LOVD 3.0 |            |          |        |                                                                                                                                           |                           |
| 17 | r.1846_2001del | No entries in LOVD 3.0 |            |          |        |                                                                                                                                           |                           |
| 18 | r.2002_2251del | No entries in LOVD 3.0 |            |          |        |                                                                                                                                           |                           |
| 19 | r.2252_2325del | p.Arg752fs             | NF1_000183 | De Novo  | 64300  | <a href="https://databases.lovd.nl/shared/variants/0000095838#00014502">https://databases.lovd.nl/shared/variants/0000095838#00014502</a> |                           |
|    |                |                        | NF1_000183 | De Novo  | 128919 | <a href="https://databases.lovd.nl/shared/variants/0000218931#00014502">https://databases.lovd.nl/shared/variants/0000218931#00014502</a> |                           |
|    |                |                        | NF1_000183 | Germline | 177090 | <a href="https://databases.lovd.nl/shared/variants/0000401383#00014502">https://databases.lovd.nl/shared/variants/0000401383#00014502</a> |                           |
|    |                |                        | NF1_000180 | De Novo  | 128915 | <a href="https://databases.lovd.nl/shared/variants/0000218927#00014502">https://databases.lovd.nl/shared/variants/0000218927#00014502</a> |                           |
|    |                |                        | NF1_000180 | Unknown  | 130543 | <a href="https://databases.lovd.nl/shared/variants/0000220555#00014502">https://databases.lovd.nl/shared/variants/0000220555#00014502</a> | Maynard et al. 1997       |
|    |                |                        | NF1_000180 | Unknown  | 131101 | <a href="https://databases.lovd.nl/shared/variants/0000221115#00014502">https://databases.lovd.nl/shared/variants/0000221115#00014502</a> | Maynard et al. 1997       |
|    |                |                        | NF1_001209 | Unknown  | 130541 | <a href="https://databases.lovd.nl/shared/variants/0000220553#00014502">https://databases.lovd.nl/shared/variants/0000220553#00014502</a> | Origone et al. 2003       |
|    |                |                        | NF1_001713 | De Novo  | 131400 | <a href="https://databases.lovd.nl/shared/variants/0000221414#00014502">https://databases.lovd.nl/shared/variants/0000221414#00014502</a> |                           |
|    |                |                        | NF1_001208 | De Novo  | 64312  | <a href="https://databases.lovd.nl/shared/variants/0000095850#00014502">https://databases.lovd.nl/shared/variants/0000095850#00014502</a> |                           |
|    |                |                        | NF1_001208 | Unknown  | 130539 | <a href="https://databases.lovd.nl/shared/variants/0000220551#00014502">https://databases.lovd.nl/shared/variants/0000220551#00014502</a> | Sabbagh et al. 2013       |
|    |                |                        | NF1_001208 | Unknown  | 130540 | <a href="https://databases.lovd.nl/shared/variants/0000220552#00014502">https://databases.lovd.nl/shared/variants/0000220552#00014502</a> | Sabbagh et al. 2013       |
|    |                |                        | NF1_001208 | Germline | 132889 | <a href="https://databases.lovd.nl/shared/variants/0000223151#00014502">https://databases.lovd.nl/shared/variants/0000223151#00014502</a> | Sabbagh et al. 2013       |
| 20 | r.2326_2409del | No entries in LOVD 3.0 |            |          |        |                                                                                                                                           |                           |
| 21 | r.2410_2850del | p.Ala804_Gln950del     | NF1_001781 | Unknown  | 131471 | <a href="https://databases.lovd.nl/shared/variants/0000221485#00014502">https://databases.lovd.nl/shared/variants/0000221485#00014502</a> | Hsiao et al. 2015         |
| 22 | r.2851_2990del | p.Leu952fs             | NF1_001524 | Unknown  | 131112 | <a href="https://databases.lovd.nl/shared/variants/0000221126#00014502">https://databases.lovd.nl/shared/variants/0000221126#00014502</a> |                           |
|    |                |                        | NF1_001008 | Unknown  | 64315  | <a href="https://databases.lovd.nl/shared/variants/0000095853#00014502">https://databases.lovd.nl/shared/variants/0000095853#00014502</a> |                           |
|    |                |                        | NF1_001008 | Unknown  | 130235 | <a href="https://databases.lovd.nl/shared/variants/0000220247#00014502">https://databases.lovd.nl/shared/variants/0000220247#00014502</a> |                           |
|    |                |                        | NF1_001008 | Unknown  | 130574 | <a href="https://databases.lovd.nl/shared/variants/0000220586#00014502">https://databases.lovd.nl/shared/variants/0000220586#00014502</a> | Sabbagh et al. 2013       |
|    |                |                        | NF1_001008 | Unknown  | 131113 | <a href="https://databases.lovd.nl/shared/variants/0000221127#00014502">https://databases.lovd.nl/shared/variants/0000221127#00014502</a> |                           |
|    |                |                        | NF1_001008 | Unknown  | 131815 | <a href="https://databases.lovd.nl/shared/variants/0000221830#00014502">https://databases.lovd.nl/shared/variants/0000221830#00014502</a> | Cali et al. ??            |
|    |                |                        | NF1_001234 | Unknown  | 130579 | <a href="https://databases.lovd.nl/shared/variants/0000220591#00014502">https://databases.lovd.nl/shared/variants/0000220591#00014502</a> | Jeong et al. 2006         |
|    |                |                        | NF1_001231 | Unknown  | 130575 | <a href="https://databases.lovd.nl/shared/variants/0000220587#00014502">https://databases.lovd.nl/shared/variants/0000220587#00014502</a> | Sabbagh et al. 2013       |
|    |                |                        | NF1_001232 | Unknown  | 130577 | <a href="https://databases.lovd.nl/shared/variants/0000220589#00014502">https://databases.lovd.nl/shared/variants/0000220589#00014502</a> | Sabbagh et al. 2013       |
|    |                |                        | NF1_000281 | De Novo  | 129065 | <a href="https://databases.lovd.nl/shared/variants/0000219077#00014502">https://databases.lovd.nl/shared/variants/0000219077#00014502</a> |                           |
|    |                |                        | NF1_000281 | Unknown  | 130576 | <a href="https://databases.lovd.nl/shared/variants/0000220588#00014502">https://databases.lovd.nl/shared/variants/0000220588#00014502</a> | Sabbagh et al. 2013       |
|    |                |                        | NF1_000285 | De Novo  | 129070 | <a href="https://databases.lovd.nl/shared/variants/0000219082#00014502">https://databases.lovd.nl/shared/variants/0000219082#00014502</a> |                           |
|    |                |                        | NF1_000285 | Unknown  | 130580 | <a href="https://databases.lovd.nl/shared/variants/0000220592#00014502">https://databases.lovd.nl/shared/variants/0000220592#00014502</a> | Wimmer et al. 2007        |
|    |                |                        | NF1_001716 | Germline | 131403 | <a href="https://databases.lovd.nl/shared/variants/0000221417#00014502">https://databases.lovd.nl/shared/variants/0000221417#00014502</a> |                           |
| 23 | r.2991_3113del | p.Tyr998_Arg1038del    | NF1_000289 | De Novo  | 129074 | <a href="https://databases.lovd.nl/shared/variants/0000219086#00014502">https://databases.lovd.nl/shared/variants/0000219086#00014502</a> |                           |
|    |                |                        | NF1_000289 | Unknown  | 129075 | <a href="https://databases.lovd.nl/shared/variants/0000219087#00014502">https://databases.lovd.nl/shared/variants/0000219087#00014502</a> |                           |
|    |                |                        | NF1_000289 | Unknown  | 129076 | <a href="https://databases.lovd.nl/shared/variants/0000219088#00014502">https://databases.lovd.nl/shared/variants/0000219088#00014502</a> |                           |
|    |                |                        | NF1_000289 | De Novo  | 130583 | <a href="https://databases.lovd.nl/shared/variants/0000220595#00014502">https://databases.lovd.nl/shared/variants/0000220595#00014502</a> | Osborn and Upadhyaya 1999 |
|    |                |                        | NF1_000289 | De Novo  | 131605 | <a href="https://databases.lovd.nl/shared/variants/0000221619#00014502">https://databases.lovd.nl/shared/variants/0000221619#00014502</a> |                           |
|    |                |                        | NF1_001235 | Unknown  | 130581 | <a href="https://databases.lovd.nl/shared/variants/0000220593#00014502">https://databases.lovd.nl/shared/variants/0000220593#00014502</a> | Sabbagh et al. 2013       |
|    |                |                        | NF1_001238 | Germline | 130585 | <a href="https://databases.lovd.nl/shared/variants/0000220597#00014502">https://databases.lovd.nl/shared/variants/0000220597#00014502</a> | Ars et al. 2000           |
|    |                |                        | NF1_001238 | Unknown  | 131122 | <a href="https://databases.lovd.nl/shared/variants/0000221136#00014502">https://databases.lovd.nl/shared/variants/0000221136#00014502</a> | Pros et al. 2008          |
| 24 | r.3114_3197del | No entries in LOVD 3.0 |            |          |        |                                                                                                                                           |                           |
| 25 | r.3198_3314del | No entries in LOVD 3.0 |            |          |        |                                                                                                                                           |                           |
| 26 | r.3315_3496del | p.Tyr1106fs            | NF1_002197 | De novo  | 64321  | <a href="https://databases.lovd.nl/shared/variants/0000095860#00014502">https://databases.lovd.nl/shared/variants/0000095860#00014502</a> |                           |
|    |                |                        | NF1_002197 | Unknown  | 64339  | <a href="https://databases.lovd.nl/shared/variants/0000095879#00014502">https://databases.lovd.nl/shared/variants/0000095879#00014502</a> |                           |
|    |                |                        | NF1_001242 | Unknown  | 130593 | <a href="https://databases.lovd.nl/shared/variants/0000220605#00014502">https://databases.lovd.nl/shared/variants/0000220605#00014502</a> | Sabbagh et al. 2013       |
|    |                |                        | NF1_001244 | Unknown  | 130600 | <a href="https://databases.lovd.nl/shared/variants/0000220612#00014502">https://databases.lovd.nl/shared/variants/0000220612#00014502</a> | Sabbagh et al. 2013       |
| 27 | r.3497_3708del | p.Gly1166fs            |            |          |        |                                                                                                                                           |                           |
| 28 | r.3709_3870del | No entries in LOVD 3.0 |            |          |        |                                                                                                                                           |                           |
| 29 | r.3871_3974del | p.Tyr1292fs            | NF1_000413 | Unknown  | 129277 | <a href="https://databases.lovd.nl/shared/variants/0000219289#00014502">https://databases.lovd.nl/shared/variants/0000219289#00014502</a> | Upadhyaya 1997            |
|    |                |                        | NF1_000413 | Unknown  | 130633 | <a href="https://databases.lovd.nl/shared/variants/0000220645#00014502">https://databases.lovd.nl/shared/variants/0000220645#00014502</a> | Upadhyaya 1997            |
|    |                |                        | NF1_000413 | Unknown  | 130634 | <a href="https://databases.lovd.nl/shared/variants/0000220646#00014502">https://databases.lovd.nl/shared/variants/0000220646#00014502</a> | Upadhyaya 1997            |
|    |                |                        | NF1_000413 | Unknown  | 130932 | <a href="https://databases.lovd.nl/shared/variants/0000220946#00014502">https://databases.lovd.nl/shared/variants/0000220946#00014502</a> | Upadhyaya 1997            |
|    |                |                        | NF1_000414 | Unknown  | 132944 | <a href="https://databases.lovd.nl/shared/variants/0000223206#00014502">https://databases.lovd.nl/shared/variants/0000223206#00014502</a> | Upadhyaya 1997            |
| 30 | r.3975_4110del | p.Leu1326fs            | NF1_001696 | Germline | 131383 | <a href="https://databases.lovd.nl/shared/variants/0000221397#00014502">https://databases.lovd.nl/shared/variants/0000221397#00014502</a> |                           |
|    |                |                        | NF1_001785 | De Novo  | 131475 | <a href="https://databases.lovd.nl/shared/variants/0000221489#00014502">https://databases.lovd.nl/shared/variants/0000221489#00014502</a> | Hsiao et al. 2015         |
| 31 | r.4111_4269del | No entries in LOVD 3.0 |            |          |        |                                                                                                                                           |                           |
| 32 | r.4270_4367del | p.Ile1424fs            | NF1_001273 | Unknown  | 130657 | <a href="https://databases.lovd.nl/shared/variants/0000220669#00014502">https://databases.lovd.nl/shared/variants/0000220669#00014502</a> | Sabbagh et al. 2013       |

|    |                |                        |            |          |        |                                                                                                                                           |                                       |
|----|----------------|------------------------|------------|----------|--------|-------------------------------------------------------------------------------------------------------------------------------------------|---------------------------------------|
|    |                |                        | NF1_001420 | Unknown  | 131169 | <a href="https://databases.lovd.nl/shared/variants/0000221183#00014502">https://databases.lovd.nl/shared/variants/0000221183#00014502</a> | Pros et al. 2008                      |
|    |                |                        | NF1_001421 | Unknown  | 130922 | <a href="https://databases.lovd.nl/shared/variants/0000220936#00014502">https://databases.lovd.nl/shared/variants/0000220936#00014502</a> |                                       |
|    |                |                        | NF1_001420 | Somatic  | 177019 | <a href="https://databases.lovd.nl/shared/variants/0000400792#00014502">https://databases.lovd.nl/shared/variants/0000400792#00014502</a> |                                       |
| 33 | r.4368_4514del | p.Phe1457_Arg1505del49 | NF1_001787 | De Novo  | 131477 | <a href="https://databases.lovd.nl/shared/variants/0000221491#00014502">https://databases.lovd.nl/shared/variants/0000221491#00014502</a> | Hsiao et al. 2015                     |
| 34 | r.4515_4661del | p.Asp1506fs            | NF1_002054 | Unknown  | 64579  | <a href="https://databases.lovd.nl/shared/variants/0000096127#00014502">https://databases.lovd.nl/shared/variants/0000096127#00014502</a> |                                       |
|    |                |                        | NF1_001557 | Unknown  | 131183 | <a href="https://databases.lovd.nl/shared/variants/0000221197#00014502">https://databases.lovd.nl/shared/variants/0000221197#00014502</a> | Pros et al. 2008                      |
| 35 | r.4662_4772del | p.His1555_Arg1591del37 | NF1_001790 | Germline | 131480 | <a href="https://databases.lovd.nl/shared/variants/0000221494#00014502">https://databases.lovd.nl/shared/variants/0000221494#00014502</a> | Hsiao et al. 2015                     |
|    |                |                        | NF1_001788 | De novo  | 131478 | <a href="https://databases.lovd.nl/shared/variants/0000221492#00014502">https://databases.lovd.nl/shared/variants/0000221492#00014502</a> | Hsiao et al. 2015                     |
|    |                |                        | NF1_001789 | De novo  | 131479 | <a href="https://databases.lovd.nl/shared/variants/0000221493#00014502">https://databases.lovd.nl/shared/variants/0000221493#00014502</a> | Hsiao et al. 2015                     |
| 36 | r.4773_5205del | No entries in LOVD 3.0 |            |          |        |                                                                                                                                           |                                       |
| 37 | r.5206_5546del | p.Gly1737fs            | NF1_001384 | De novo  | 130855 | <a href="https://databases.lovd.nl/shared/variants/0000220867#00014502">https://databases.lovd.nl/shared/variants/0000220867#00014502</a> | Sabbagh et al. 2013                   |
|    |                |                        | NF1_001313 | Unknown  | 130727 | <a href="https://databases.lovd.nl/shared/variants/0000220739#00014502">https://databases.lovd.nl/shared/variants/0000220739#00014502</a> | Peters et al. 1999                    |
|    |                |                        | NF1_000677 | Unknown  | 64521  | <a href="https://databases.lovd.nl/shared/variants/0000096067#00014502">https://databases.lovd.nl/shared/variants/0000096067#00014502</a> |                                       |
|    |                |                        | NF1_000677 | Unknown  | 129696 | <a href="https://databases.lovd.nl/shared/variants/0000219708#00014502">https://databases.lovd.nl/shared/variants/0000219708#00014502</a> | Ars et al. 2003                       |
|    |                |                        | NF1_000677 | De Novo  | 129697 | <a href="https://databases.lovd.nl/shared/variants/0000219709#00014502">https://databases.lovd.nl/shared/variants/0000219709#00014502</a> | Ars et al. 2003                       |
|    |                |                        | NF1_000677 | De Novo  | 129698 | <a href="https://databases.lovd.nl/shared/variants/0000219710#00014502">https://databases.lovd.nl/shared/variants/0000219710#00014502</a> | Ars et al. 2003                       |
|    |                |                        | NF1_000677 | De Novo  | 129699 | <a href="https://databases.lovd.nl/shared/variants/0000219711#00014502">https://databases.lovd.nl/shared/variants/0000219711#00014502</a> | Ars et al. 2003                       |
|    |                |                        | NF1_000677 | Unknown  | 129700 | <a href="https://databases.lovd.nl/shared/variants/0000219712#00014502">https://databases.lovd.nl/shared/variants/0000219712#00014502</a> | Ars et al. 2003                       |
|    |                |                        | NF1_000677 | Unknown  | 129701 | <a href="https://databases.lovd.nl/shared/variants/0000219713#00014502">https://databases.lovd.nl/shared/variants/0000219713#00014502</a> | Ars et al. 2003                       |
|    |                |                        | NF1_000677 | Unknown  | 129702 | <a href="https://databases.lovd.nl/shared/variants/0000219714#00014502">https://databases.lovd.nl/shared/variants/0000219714#00014502</a> | Ars et al. 2003                       |
|    |                |                        | NF1_000677 | Unknown  | 129703 | <a href="https://databases.lovd.nl/shared/variants/0000219715#00014502">https://databases.lovd.nl/shared/variants/0000219715#00014502</a> | Ars et al. 2003                       |
|    |                |                        | NF1_000677 | Unknown  | 129704 | <a href="https://databases.lovd.nl/shared/variants/0000219716#00014502">https://databases.lovd.nl/shared/variants/0000219716#00014502</a> | Ars et al. 2003                       |
|    |                |                        | NF1_000677 | Unknown  | 129705 | <a href="https://databases.lovd.nl/shared/variants/0000219717#00014502">https://databases.lovd.nl/shared/variants/0000219717#00014502</a> | Ars et al. 2003                       |
|    |                |                        | NF1_000677 | Unknown  | 130712 | <a href="https://databases.lovd.nl/shared/variants/0000220724#00014502">https://databases.lovd.nl/shared/variants/0000220724#00014502</a> | Ars et al. 2003                       |
|    |                |                        | NF1_000677 | Unknown  | 130713 | <a href="https://databases.lovd.nl/shared/variants/0000220725#00014502">https://databases.lovd.nl/shared/variants/0000220725#00014502</a> | Ars et al. 2003                       |
|    |                |                        | NF1_000677 | Unknown  | 130891 | <a href="https://databases.lovd.nl/shared/variants/0000220905#00014502">https://databases.lovd.nl/shared/variants/0000220905#00014502</a> | Ars et al. 2003                       |
|    |                |                        | NF1_000677 | Unknown  | 131213 | <a href="https://databases.lovd.nl/shared/variants/0000221227#00014502">https://databases.lovd.nl/shared/variants/0000221227#00014502</a> | Ars et al. 2000                       |
|    |                |                        | NF1_000677 | Unknown  | 131214 | <a href="https://databases.lovd.nl/shared/variants/0000221228#00014502">https://databases.lovd.nl/shared/variants/0000221228#00014502</a> | Ars et al. 2000                       |
|    |                |                        | NF1_001312 | Unknown  | 130721 | <a href="https://databases.lovd.nl/shared/variants/0000220733#00014502">https://databases.lovd.nl/shared/variants/0000220733#00014502</a> | Ars et al. 2000; Kluwe et al. 2003    |
|    |                |                        | NF1_000678 | De novo  | 129706 | <a href="https://databases.lovd.nl/shared/variants/0000219718#00014502">https://databases.lovd.nl/shared/variants/0000219718#00014502</a> | Ars et al. 2000                       |
|    |                |                        | NF1_000678 | Unknown  | 130725 | <a href="https://databases.lovd.nl/shared/variants/0000220737#00014502">https://databases.lovd.nl/shared/variants/0000220737#00014502</a> | Ars et al. 2000                       |
|    |                |                        | NF1_000673 | Unknown  | 129690 | <a href="https://databases.lovd.nl/shared/variants/0000219702#00014502">https://databases.lovd.nl/shared/variants/0000219702#00014502</a> | Fahsold et al. 2000                   |
|    |                |                        | NF1_000673 | Unknown  | 130726 | <a href="https://databases.lovd.nl/shared/variants/0000220738#00014502">https://databases.lovd.nl/shared/variants/0000220738#00014502</a> | Fahsold et al. 2000                   |
|    |                |                        | NF1_000673 | Unknown  | 131215 | <a href="https://databases.lovd.nl/shared/variants/0000221229#00014502">https://databases.lovd.nl/shared/variants/0000221229#00014502</a> | Fahsold et al. 2000                   |
|    |                |                        | NF1_001573 | Unknown  | 131216 | <a href="https://databases.lovd.nl/shared/variants/0000221230#00014502">https://databases.lovd.nl/shared/variants/0000221230#00014502</a> |                                       |
| 38 | r.5547_5749del | p.Ser1850fs            | NF1_001314 | Unknown  | 130728 | <a href="https://databases.lovd.nl/shared/variants/0000220740#00014502">https://databases.lovd.nl/shared/variants/0000220740#00014502</a> | Sabbagh et al. 2013                   |
|    |                |                        | NF1_000700 | Unknown  | 129733 | <a href="https://databases.lovd.nl/shared/variants/0000219745#00014502">https://databases.lovd.nl/shared/variants/0000219745#00014502</a> | Purandare et al. 1994                 |
|    |                |                        | NF1_000700 | Unknown  | 130731 | <a href="https://databases.lovd.nl/shared/variants/0000220743#00014502">https://databases.lovd.nl/shared/variants/0000220743#00014502</a> | Purandare et al. 1994                 |
| 39 | r.5750_5943del | p.Ser1917fs            | NF1_001799 | De Novo  | 131489 | <a href="https://databases.lovd.nl/shared/variants/0000221503#00014502">https://databases.lovd.nl/shared/variants/0000221503#00014502</a> | Hsiao et al. 2015                     |
|    |                |                        | NF1_001800 | De Novo  | 131490 | <a href="https://databases.lovd.nl/shared/variants/0000221504#00014502">https://databases.lovd.nl/shared/variants/0000221504#00014502</a> | Hsiao et al. 2015                     |
|    |                |                        | NF1_001798 | Somatic  | 131488 | <a href="https://databases.lovd.nl/shared/variants/0000221502#00014502">https://databases.lovd.nl/shared/variants/0000221502#00014502</a> | Hsiao et al. 2015                     |
|    |                |                        | NF1_001801 | De Novo  | 131491 | <a href="https://databases.lovd.nl/shared/variants/0000221505#00014502">https://databases.lovd.nl/shared/variants/0000221505#00014502</a> | Hsiao et al. 2015                     |
|    |                |                        | NF1_001316 | Unknown  | 130732 | <a href="https://databases.lovd.nl/shared/variants/0000220744#00014502">https://databases.lovd.nl/shared/variants/0000220744#00014502</a> | Sabbagh et al. 2013                   |
| 40 | r.5944_6084del |                        | NF1_002132 | De Novo  | 64524  | <a href="https://databases.lovd.nl/shared/variants/0000096071#00014502">https://databases.lovd.nl/shared/variants/0000096071#00014502</a> |                                       |
| 41 | r.6085_6364del | p.Val2029fs            | NF1_002139 | De Novo  | 64515  | <a href="https://databases.lovd.nl/shared/variants/0000096061#00014502">https://databases.lovd.nl/shared/variants/0000096061#00014502</a> |                                       |
|    |                |                        | NF1_002139 | Unknown  | 64611  | <a href="https://databases.lovd.nl/shared/variants/0000096160#00014502">https://databases.lovd.nl/shared/variants/0000096160#00014502</a> |                                       |
|    |                |                        | NF1_001322 | Unknown  | 130747 | <a href="https://databases.lovd.nl/shared/variants/0000220759#00014502">https://databases.lovd.nl/shared/variants/0000220759#00014502</a> | Sabbagh et al. 2013                   |
|    |                |                        | NF1_001322 | Unknown  | 131234 | <a href="https://databases.lovd.nl/shared/variants/0000221248#00014502">https://databases.lovd.nl/shared/variants/0000221248#00014502</a> | Sabbagh et al. 2013                   |
|    |                |                        | NF1_001323 | Unknown  | 130748 | <a href="https://databases.lovd.nl/shared/variants/0000220760#00014502">https://databases.lovd.nl/shared/variants/0000220760#00014502</a> | Sabbagh et al. 2013                   |
| 42 | r.6365_6579del | No entries in LOVD 3.0 |            |          |        |                                                                                                                                           |                                       |
| 43 | r.6580_6641del | p.Ala2194fs            | NF1_000795 | Unknown  | 129884 | <a href="https://databases.lovd.nl/shared/variants/0000219896#00014502">https://databases.lovd.nl/shared/variants/0000219896#00014502</a> | De Luca et al. 2004                   |
|    |                |                        | NF1_000795 | Unknown  | 129885 | <a href="https://databases.lovd.nl/shared/variants/0000219897#00014502">https://databases.lovd.nl/shared/variants/0000219897#00014502</a> | De Luca et al. 2004                   |
|    |                |                        | NF1_000795 | Unknown  | 130774 | <a href="https://databases.lovd.nl/shared/variants/0000220786#00014502">https://databases.lovd.nl/shared/variants/0000220786#00014502</a> | De Luca et al. 2004                   |
|    |                |                        | NF1_000796 | Germline | 129886 | <a href="https://databases.lovd.nl/shared/variants/0000219898#00014502">https://databases.lovd.nl/shared/variants/0000219898#00014502</a> |                                       |
|    |                |                        | NF1_000796 | Unknown  | 130765 | <a href="https://databases.lovd.nl/shared/variants/0000220777#00014502">https://databases.lovd.nl/shared/variants/0000220777#00014502</a> | Sabbagh et al. 2013                   |
|    |                |                        | NF1_000796 | Unknown  | 130766 | <a href="https://databases.lovd.nl/shared/variants/0000220778#00014502">https://databases.lovd.nl/shared/variants/0000220778#00014502</a> | Sabbagh et al. 2013                   |
|    |                |                        | NF1_000796 | Unknown  | 131239 | <a href="https://databases.lovd.nl/shared/variants/0000221253#00014502">https://databases.lovd.nl/shared/variants/0000221253#00014502</a> | Sabbagh et al. 2013                   |
|    |                |                        | NF1_001341 | Unknown  | 130776 | <a href="https://databases.lovd.nl/shared/variants/0000220787#00014502">https://databases.lovd.nl/shared/variants/0000220787#00014502</a> | Fahsold et al. 2000                   |
|    |                |                        | NF1_001341 | Unknown  | 130775 | <a href="https://databases.lovd.nl/shared/variants/0000220788#00014502">https://databases.lovd.nl/shared/variants/0000220788#00014502</a> | Fahsold et al. 2000                   |
| 44 | r.6642_6756del | NF1_001346             | NF1_001346 | Unknown  | 130787 | <a href="https://databases.lovd.nl/shared/variants/0000220799#00014502">https://databases.lovd.nl/shared/variants/0000220799#00014502</a> | Fahsold et al. 2000; Pros et al. 2008 |
|    |                |                        | NF1_001343 | Unknown  | 130778 | <a href="https://databases.lovd.nl/shared/variants/0000220790#00014502">https://databases.lovd.nl/shared/variants/0000220790#00014502</a> | Sabbagh et al. 2013                   |
|    |                |                        | NF1_001342 | Unknown  | 130777 | <a href="https://databases.lovd.nl/shared/variants/0000220789#00014502">https://databases.lovd.nl/shared/variants/0000220789#00014502</a> | Sabbagh et al. 2013                   |

|    |                |                        |            |          |        |                                                                                                                                           |                                                             |
|----|----------------|------------------------|------------|----------|--------|-------------------------------------------------------------------------------------------------------------------------------------------|-------------------------------------------------------------|
|    |                |                        | NF1_000809 | De novo  | 129921 | <a href="https://databases.lovd.nl/shared/variants/0000219932#00014502">https://databases.lovd.nl/shared/variants/0000219932#00014502</a> | Pros et al. 2008                                            |
|    |                |                        | NF1_000809 | Unknown  | 129920 | <a href="https://databases.lovd.nl/shared/variants/0000219933#00014502">https://databases.lovd.nl/shared/variants/0000219933#00014502</a> | Pros et al. 2008                                            |
|    |                |                        | NF1_000809 | Unknown  | 129922 | <a href="https://databases.lovd.nl/shared/variants/0000219934#00014502">https://databases.lovd.nl/shared/variants/0000219934#00014502</a> | Pros et al. 2008                                            |
|    |                |                        | NF1_000809 | Unknown  | 130788 | <a href="https://databases.lovd.nl/shared/variants/0000220800#00014502">https://databases.lovd.nl/shared/variants/0000220800#00014502</a> | Pros et al. 2008                                            |
|    |                |                        | NF1_000809 | Unknown  | 131022 | <a href="https://databases.lovd.nl/shared/variants/0000221036#00014502">https://databases.lovd.nl/shared/variants/0000221036#00014502</a> | Pros et al. 2008                                            |
| 45 | r.6757_6858del | p.Ala2253_Lys2286del   | NF1_002150 | Unknown  | 64518  | <a href="https://databases.lovd.nl/shared/variants/0000096064#00014502">https://databases.lovd.nl/shared/variants/0000096064#00014502</a> |                                                             |
|    |                |                        | NF1_001347 | Germline | 130789 | <a href="https://databases.lovd.nl/shared/variants/0000220801#00014502">https://databases.lovd.nl/shared/variants/0000220801#00014502</a> | Sabbagh et al. 2013                                         |
|    |                |                        | NF1_001348 | Unknown  | 130790 | <a href="https://databases.lovd.nl/shared/variants/0000220802#00014502">https://databases.lovd.nl/shared/variants/0000220802#00014502</a> | Sabbagh et al. 2013                                         |
|    |                |                        | NF1_000816 | Germline | 129948 | <a href="https://databases.lovd.nl/shared/variants/0000219960#00014502">https://databases.lovd.nl/shared/variants/0000219960#00014502</a> | Robinson et al. 1995                                        |
|    |                |                        | NF1_000816 | Germline | 129949 | <a href="https://databases.lovd.nl/shared/variants/0000219961#00014502">https://databases.lovd.nl/shared/variants/0000219961#00014502</a> | Robinson et al. 1995                                        |
|    |                |                        | NF1_000816 | Germline | 129950 | <a href="https://databases.lovd.nl/shared/variants/0000219962#00014502">https://databases.lovd.nl/shared/variants/0000219962#00014502</a> | Robinson et al. 1995                                        |
|    |                |                        | NF1_000816 | De novo  | 129951 | <a href="https://databases.lovd.nl/shared/variants/0000219963#00014502">https://databases.lovd.nl/shared/variants/0000219963#00014502</a> | Robinson et al. 1995                                        |
|    |                |                        | NF1_000816 | Unknown  | 129952 | <a href="https://databases.lovd.nl/shared/variants/0000219964#00014502">https://databases.lovd.nl/shared/variants/0000219964#00014502</a> | Robinson et al. 1995                                        |
|    |                |                        | NF1_000816 | Unknown  | 129953 | <a href="https://databases.lovd.nl/shared/variants/0000219965#00014502">https://databases.lovd.nl/shared/variants/0000219965#00014502</a> | Robinson et al. 1995                                        |
|    |                |                        | NF1_000816 | Unknown  | 129954 | <a href="https://databases.lovd.nl/shared/variants/0000219966#00014502">https://databases.lovd.nl/shared/variants/0000219966#00014502</a> | Robinson et al. 1995                                        |
|    |                |                        | NF1_000816 | Unknown  | 129955 | <a href="https://databases.lovd.nl/shared/variants/0000219967#00014502">https://databases.lovd.nl/shared/variants/0000219967#00014502</a> | Robinson et al. 1995                                        |
|    |                |                        | NF1_000816 | Unknown  | 129956 | <a href="https://databases.lovd.nl/shared/variants/0000219968#00014502">https://databases.lovd.nl/shared/variants/0000219968#00014502</a> | Robinson et al. 1995                                        |
|    |                |                        | NF1_000816 | Unknown  | 129957 | <a href="https://databases.lovd.nl/shared/variants/0000219969#00014502">https://databases.lovd.nl/shared/variants/0000219969#00014502</a> | Robinson et al. 1995                                        |
|    |                |                        | NF1_000816 | Unknown  | 129958 | <a href="https://databases.lovd.nl/shared/variants/0000219970#00014502">https://databases.lovd.nl/shared/variants/0000219970#00014502</a> | Robinson et al. 1995                                        |
|    |                |                        | NF1_000816 | Unknown  | 129959 | <a href="https://databases.lovd.nl/shared/variants/0000219971#00014502">https://databases.lovd.nl/shared/variants/0000219971#00014502</a> | Robinson et al. 1995                                        |
|    |                |                        | NF1_000816 | Unknown  | 129960 | <a href="https://databases.lovd.nl/shared/variants/0000219972#00014502">https://databases.lovd.nl/shared/variants/0000219972#00014502</a> | Robinson et al. 1995                                        |
|    |                |                        | NF1_000816 | Unknown  | 129961 | <a href="https://databases.lovd.nl/shared/variants/0000219973#00014502">https://databases.lovd.nl/shared/variants/0000219973#00014502</a> | Robinson et al. 1995                                        |
|    |                |                        | NF1_000816 | De novo  | 130794 | <a href="https://databases.lovd.nl/shared/variants/0000220806#00014502">https://databases.lovd.nl/shared/variants/0000220806#00014502</a> | Robinson et al. 1995                                        |
|    |                |                        | NF1_000816 | De novo  | 130795 | <a href="https://databases.lovd.nl/shared/variants/0000220807#00014502">https://databases.lovd.nl/shared/variants/0000220807#00014502</a> | Robinson et al. 1995                                        |
|    |                |                        | NF1_000816 | De novo  | 130796 | <a href="https://databases.lovd.nl/shared/variants/0000220808#00014502">https://databases.lovd.nl/shared/variants/0000220808#00014502</a> | Robinson et al. 1995                                        |
|    |                |                        | NF1_000816 | De novo  | 130797 | <a href="https://databases.lovd.nl/shared/variants/0000220809#00014502">https://databases.lovd.nl/shared/variants/0000220809#00014502</a> | Robinson et al. 1995                                        |
|    |                |                        | NF1_000816 | De novo  | 130798 | <a href="https://databases.lovd.nl/shared/variants/0000220810#00014502">https://databases.lovd.nl/shared/variants/0000220810#00014502</a> | Robinson et al. 1995                                        |
|    |                |                        | NF1_000816 | De novo  | 130799 | <a href="https://databases.lovd.nl/shared/variants/0000220811#00014502">https://databases.lovd.nl/shared/variants/0000220811#00014502</a> | Robinson et al. 1995                                        |
|    |                |                        | NF1_000816 | De novo  | 130800 | <a href="https://databases.lovd.nl/shared/variants/0000220812#00014502">https://databases.lovd.nl/shared/variants/0000220812#00014502</a> | Robinson et al. 1995                                        |
|    |                |                        | NF1_000816 | Unknown  | 131245 | <a href="https://databases.lovd.nl/shared/variants/0000221259#00014502">https://databases.lovd.nl/shared/variants/0000221259#00014502</a> | Robinson et al. 1995                                        |
|    |                |                        | NF1_000816 | Unknown  | 131246 | <a href="https://databases.lovd.nl/shared/variants/0000221260#00014502">https://databases.lovd.nl/shared/variants/0000221260#00014502</a> | Robinson et al. 1995                                        |
|    |                |                        | NF1_000816 | De Novo  | 131850 | <a href="https://databases.lovd.nl/shared/variants/0000221865#00014502">https://databases.lovd.nl/shared/variants/0000221865#00014502</a> | Robinson et al. 1995                                        |
|    |                |                        | NF1_000816 | Unknown  | 131851 | <a href="https://databases.lovd.nl/shared/variants/0000221866#00014502">https://databases.lovd.nl/shared/variants/0000221866#00014502</a> | Robinson et al. 1995                                        |
|    |                |                        | NF1_000816 | De Novo  | 64516  | <a href="https://databases.lovd.nl/shared/variants/0000096062#00014502">https://databases.lovd.nl/shared/variants/0000096062#00014502</a> |                                                             |
|    |                |                        | NF1_000816 | De Novo  | 64517  | <a href="https://databases.lovd.nl/shared/variants/0000096063#00014502">https://databases.lovd.nl/shared/variants/0000096063#00014502</a> |                                                             |
|    |                |                        | NF1_000816 | Unknown  | 64537  | <a href="https://databases.lovd.nl/shared/variants/0000096084#00014502">https://databases.lovd.nl/shared/variants/0000096084#00014502</a> |                                                             |
|    |                |                        | NF1_000816 | De Novo  | 64538  | <a href="https://databases.lovd.nl/shared/variants/0000096085#00014502">https://databases.lovd.nl/shared/variants/0000096085#00014502</a> |                                                             |
|    |                |                        | NF1_000816 | Unknown  | 64539  | <a href="https://databases.lovd.nl/shared/variants/0000096086#00014502">https://databases.lovd.nl/shared/variants/0000096086#00014502</a> |                                                             |
|    |                |                        | NF1_000816 | Unknown  | 131744 | <a href="https://databases.lovd.nl/shared/variants/0000221758#00014502">https://databases.lovd.nl/shared/variants/0000221758#00014502</a> |                                                             |
|    |                |                        | NF1_000816 | Unknown  | 131745 | <a href="https://databases.lovd.nl/shared/variants/0000221759#00014502">https://databases.lovd.nl/shared/variants/0000221759#00014502</a> |                                                             |
|    |                |                        | NF1_000816 | Germline | 131746 | <a href="https://databases.lovd.nl/shared/variants/0000221760#00014502">https://databases.lovd.nl/shared/variants/0000221760#00014502</a> |                                                             |
|    |                |                        | NF1_000817 | De novo  | 129962 | <a href="https://databases.lovd.nl/shared/variants/0000219974#00014502">https://databases.lovd.nl/shared/variants/0000219974#00014502</a> | Messiaen et al. 1997, Wimmer et al. 2007, Skoko et al. 2008 |
|    |                |                        | NF1_000817 | Unknown  | 129963 | <a href="https://databases.lovd.nl/shared/variants/0000219975#00014502">https://databases.lovd.nl/shared/variants/0000219975#00014502</a> | Messiaen et al. 1997, Wimmer et al. 2007, Skoko et al. 2008 |
|    |                |                        | NF1_000817 | Unknown  | 129964 | <a href="https://databases.lovd.nl/shared/variants/0000219976#00014502">https://databases.lovd.nl/shared/variants/0000219976#00014502</a> | Messiaen et al. 1997, Wimmer et al. 2007, Skoko et al. 2008 |
|    |                |                        | NF1_000817 | Unknown  | 129965 | <a href="https://databases.lovd.nl/shared/variants/0000219977#00014502">https://databases.lovd.nl/shared/variants/0000219977#00014502</a> | Messiaen et al. 1997, Wimmer et al. 2007, Skoko et al. 2008 |
|    |                |                        | NF1_000817 | De novo  | 130803 | <a href="https://databases.lovd.nl/shared/variants/0000220815#00014502">https://databases.lovd.nl/shared/variants/0000220815#00014502</a> | Messiaen et al. 1997, Wimmer et al. 2007, Skoko et al. 2008 |
|    |                |                        | NF1_000817 | Unknown  | 130869 | <a href="https://databases.lovd.nl/shared/variants/0000220883#00014502">https://databases.lovd.nl/shared/variants/0000220883#00014502</a> | Messiaen et al. 1997, Wimmer et al. 2007, Skoko et al. 2008 |
|    |                |                        | NF1_000821 | Unknown  | 129969 | <a href="https://databases.lovd.nl/shared/variants/0000219981#00014502">https://databases.lovd.nl/shared/variants/0000219981#00014502</a> | Upadhyaya et al. 1996                                       |
|    |                |                        | NF1_000821 | Unknown  | 129970 | <a href="https://databases.lovd.nl/shared/variants/0000219982#00014502">https://databases.lovd.nl/shared/variants/0000219982#00014502</a> | Upadhyaya et al. 1996                                       |
|    |                |                        | NF1_000821 | Unknown  | 130801 | <a href="https://databases.lovd.nl/shared/variants/0000220813#00014502">https://databases.lovd.nl/shared/variants/0000220813#00014502</a> | Upadhyaya et al. 1996                                       |
|    |                |                        | NF1_000821 | Unknown  | 130802 | <a href="https://databases.lovd.nl/shared/variants/0000220814#00014502">https://databases.lovd.nl/shared/variants/0000220814#00014502</a> | Upadhyaya et al. 1996                                       |
|    |                |                        | NF1_000823 | Unknown  | 64530  | <a href="https://databases.lovd.nl/shared/variants/0000096077#00014502">https://databases.lovd.nl/shared/variants/0000096077#00014502</a> |                                                             |
|    |                |                        | NF1_000823 | Unknown  | 64527  | <a href="https://databases.lovd.nl/shared/variants/0000096074#00014502">https://databases.lovd.nl/shared/variants/0000096074#00014502</a> |                                                             |
|    |                |                        | NF1_000823 | Unknown  | 129972 | <a href="https://databases.lovd.nl/shared/variants/0000219984#00014502">https://databases.lovd.nl/shared/variants/0000219984#00014502</a> |                                                             |
| 46 | r.6859_6999del | No entries in LOVD 3.0 |            |          |        |                                                                                                                                           |                                                             |
| 47 | r.7000_7126del | p.Ser2334fs            | NF1_001355 | Unknown  | 130812 | <a href="https://databases.lovd.nl/shared/variants/0000220824#00014502">https://databases.lovd.nl/shared/variants/0000220824#00014502</a> | Sabbagh et al. 2013                                         |
|    |                |                        | NF1_001356 | Unknown  | 130813 | <a href="https://databases.lovd.nl/shared/variants/0000220825#00014502">https://databases.lovd.nl/shared/variants/0000220825#00014502</a> | Sabbagh et al. 2013                                         |
| 48 | r.7127_7258del | p.Gly2376_Ala2419del   | NF1_001366 | Germline | 130825 | <a href="https://databases.lovd.nl/shared/variants/0000220837#00014502">https://databases.lovd.nl/shared/variants/0000220837#00014502</a> | Griffiths et al. 2007                                       |
|    |                |                        | NF1_000865 | Unknown  | 64423  | <a href="https://databases.lovd.nl/shared/variants/0000095965#00014502">https://databases.lovd.nl/shared/variants/0000095965#00014502</a> |                                                             |
|    |                |                        | NF1_000865 | De novo  | 130031 | <a href="https://databases.lovd.nl/shared/variants/0000220043#00014502">https://databases.lovd.nl/shared/variants/0000220043#00014502</a> |                                                             |
|    |                |                        | NF1_000865 | Unknown  | 131253 | <a href="https://databases.lovd.nl/shared/variants/0000221267#00014502">https://databases.lovd.nl/shared/variants/0000221267#00014502</a> |                                                             |
|    |                |                        | NF1_001587 | Unknown  | 131254 | <a href="https://databases.lovd.nl/shared/variants/0000221268#00014502">https://databases.lovd.nl/shared/variants/0000221268#00014502</a> | Pros et al. 2008                                            |

|    |                |                        |            |         |        |                                                                                                                                           |                     |  |
|----|----------------|------------------------|------------|---------|--------|-------------------------------------------------------------------------------------------------------------------------------------------|---------------------|--|
| 49 | r.7259_7394del | No entries in LOVD 3.0 |            |         |        |                                                                                                                                           |                     |  |
| 50 | r.7395_7552del | p.Thr2466fs            | NF1_001809 | De novo | 131499 | <a href="https://databases.lovd.nl/shared/variants/0000221513#00014502">https://databases.lovd.nl/shared/variants/0000221513#00014502</a> | Hsiao et al. 2015   |  |
|    |                |                        | NF1_001370 | Unknown | 130830 | <a href="https://databases.lovd.nl/shared/variants/0000220842#00014502">https://databases.lovd.nl/shared/variants/0000220842#00014502</a> | Brems et al. 2009   |  |
| 51 | r.7553_7675del | No entries in LOVD 3.0 |            |         |        |                                                                                                                                           |                     |  |
| 52 | r.7676_7806del | No entries in LOVD 3.0 |            |         |        |                                                                                                                                           |                     |  |
| 53 | r.7807_7907del | p.Thr2604fs            | NF1_001378 | Unknown | 130846 | <a href="https://databases.lovd.nl/shared/variants/0000220858#00014502">https://databases.lovd.nl/shared/variants/0000220858#00014502</a> | Sabbagh et al. 2013 |  |
|    |                |                        | NF1_000909 | Unknown | 130847 | <a href="https://databases.lovd.nl/shared/variants/0000220859#00014502">https://databases.lovd.nl/shared/variants/0000220859#00014502</a> | Sabbagh et al. 2013 |  |
|    |                |                        | NF1_000909 | Unknown | 131266 | <a href="https://databases.lovd.nl/shared/variants/0000221280#00014502">https://databases.lovd.nl/shared/variants/0000221280#00014502</a> | Sabbagh et al. 2013 |  |
|    |                |                        | NF1_000909 | Unknown | 130100 | <a href="https://databases.lovd.nl/shared/variants/0000220112#00014502">https://databases.lovd.nl/shared/variants/0000220112#00014502</a> |                     |  |
|    |                |                        | NF1_000909 | Unknown | 130099 | <a href="https://databases.lovd.nl/shared/variants/0000220111#00014502">https://databases.lovd.nl/shared/variants/0000220111#00014502</a> |                     |  |
|    |                |                        | NF1_001598 | Unknown | 131271 | <a href="https://databases.lovd.nl/shared/variants/0000221285#00014502">https://databases.lovd.nl/shared/variants/0000221285#00014502</a> | De Luca et al. 2004 |  |
|    |                |                        | NF1_001599 | Unknown | 131272 | <a href="https://databases.lovd.nl/shared/variants/0000221286#00014502">https://databases.lovd.nl/shared/variants/0000221286#00014502</a> |                     |  |
| 54 | r.7908_8050del | p.Val2636fs            | NF1_001111 | Unknown | 130849 | <a href="https://databases.lovd.nl/shared/variants/0000220861#00014502">https://databases.lovd.nl/shared/variants/0000220861#00014502</a> | Sabbagh et al. 2013 |  |
|    |                |                        | NF1_001111 | Unknown | 130343 | <a href="https://databases.lovd.nl/shared/variants/0000220355#00014502">https://databases.lovd.nl/shared/variants/0000220355#00014502</a> |                     |  |
| 55 | r.8051_8097del | No entries in LOVD 3.0 |            |         |        |                                                                                                                                           |                     |  |
| 56 | r.8098_8314del | No entries in LOVD 3.0 |            |         |        |                                                                                                                                           |                     |  |
| 57 | r.8315_8454del | No entries in LOVD 3.0 |            |         |        |                                                                                                                                           |                     |  |



## Supplemental Table 1C: Exon Deletions References

### Reference

Ars et al., Prenat Diagn, 19(8), 1999  
Ars et al., Hum Mol Genet, 9(2), 2000  
Ars et al., J Med Genet, 40:e82, 2003  
Brems et al., Cancer Res, 69, 2009  
De Luca et al., Hum Mutat, 21, 2003  
De Luca et al., Hum Mutat, 23, 2004  
De Luca et al., J Med Genet, 44, 2007  
De Smet et al, J Med Genet, 39, 2002  
Fahsold et al., Am J Hum Genet, 66(3), 2000  
Girondon-Boulandet et al, Hum Mutat, 16, 2000  
Griffiths et al, Familial Cancer, 6, 2007  
Hoffmeyer et al., Am J Hum Genet, 62, 1998  
Hsiao et al., AJHG, 97, 2015  
Jeong et al., J Korean Med Sci, 21(1), 2006  
Kluwe et al., Hum Mutat, 19, 2002  
Liu et al., J Hum Genet, 48, 2003  
Maynard et al., Hum Genet, 99, 1997  
Messiaen et al., Hum Genet, 101(1), 1997  
Messiaen et al., Hum Mutat, 15, 2000  
Nemethova et al., Annals of Human Genetics, 77, 2013  
Origone et al., Am J Med Genet A, 118A(4), 2003  
Osborn and Upadhyaya, Hum Genet, 105(4), 1999  
Peters et al., Hum Mutat, 13(3), 1999  
Pros et al., Hum Mutat, 29, 2008  
Purandare et al., Hum Mol Genet, 3(7), 1994  
Purandare et al., Hum Mol Genet, 4, 1995  
Robinson et al., Hum Genet, 96(1), 1995  
Sabbagh et al., Hum Mutat, 34, 2013  
Skoko et al., FEBS Lett, 582(15), 2008  
Upadhyaya et al., Am J Hum Genet, 67(4), 1996  
Upadhyaya et al., Hum Genet, 99, 1997  
Wimmer et al., Hum Mutat, 28, 2007  
Xu et al, Int J Mol Med, 34, 2014  
Zatkova et al., Hum Mutat, 24, 2004

### Link

<https://www.ncbi.nlm.nih.gov/pubmed/10451518>  
<http://www.ncbi.nlm.nih.gov/pubmed/10607834>  
<https://www.ncbi.nlm.nih.gov/pubmed/12807981>  
<https://www.ncbi.nlm.nih.gov/pubmed/19738042>  
<https://onlinelibrary.wiley.com/doi/epdf/10.1002/humu.9111>  
<https://www.ncbi.nlm.nih.gov/pubmed/15146469>  
<https://img.bmj.com/content/jmedgenet/44/12/800.full.pdf>  
<https://img.bmj.com/content/jmedgenet/39/8/e45.full.pdf>  
<http://www.ncbi.nlm.nih.gov/pubmed/10712197>  
<https://www.ncbi.nlm.nih.gov/pubmed/10980545>  
<https://www.ncbi.nlm.nih.gov/pubmed/16944272>  
<https://europepmc.org/articles/pmc1376891>  
<https://www.ncbi.nlm.nih.gov/pubmed/26189818>  
<https://www.ncbi.nlm.nih.gov/pubmed/16479075>  
<https://www.ncbi.nlm.nih.gov/pubmed/12746402>  
<https://www.ncbi.nlm.nih.gov/pubmed/14513407>  
<https://link.springer.com/article/10.1007/s004390050427>  
<https://www.ncbi.nlm.nih.gov/pubmed/9385374>  
<https://www.ncbi.nlm.nih.gov/pubmed/10862084>  
<https://onlinelibrary.wiley.com/doi/full/10.1111/ahg.12026>  
<http://www.ncbi.nlm.nih.gov/pubmed/12687660>  
<https://www.ncbi.nlm.nih.gov/pubmed/10543400>  
<https://www.ncbi.nlm.nih.gov/pubmed/10090487>  
<https://www.ncbi.nlm.nih.gov/pubmed/18546366>  
<https://www.ncbi.nlm.nih.gov/pubmed/7981679>  
<http://citeseerx.ist.psu.edu/viewdoc/download?doi=10.1.1.870.5910&rep=rep1&type=pdf>  
<https://www.ncbi.nlm.nih.gov/pubmed/7607663>  
<http://www.ncbi.nlm.nih.gov/pubmed/23913538>  
<https://www.ncbi.nlm.nih.gov/pubmed/18503770>  
<https://www.ncbi.nlm.nih.gov/pubmed/8837715>  
<https://www.ncbi.nlm.nih.gov/pubmed/9003501>  
<http://www.ncbi.nlm.nih.gov/pubmed/17311297>  
<https://www.ncbi.nlm.nih.gov/pubmed/24789688>  
<https://www.ncbi.nlm.nih.gov/pubmed/15523642>

Zhang et al., Sci Rep, 5:11291, 2015

<https://www.ncbi.nlm.nih.gov/pmc/articles/PMC4460887/>

**Supplementary Table 2: Assessment of selected exons as targets for therapeutic exon skipping**

| <b>Exon</b> | <b>Details</b>                                                                                                                                                                                                                                                                                                                                                                                                                                                                                                                                                                                                                                                                                                                                                                                                                                                                                                                                                                                                                                                         | <b>Conclusion</b>                                                                                                                 |
|-------------|------------------------------------------------------------------------------------------------------------------------------------------------------------------------------------------------------------------------------------------------------------------------------------------------------------------------------------------------------------------------------------------------------------------------------------------------------------------------------------------------------------------------------------------------------------------------------------------------------------------------------------------------------------------------------------------------------------------------------------------------------------------------------------------------------------------------------------------------------------------------------------------------------------------------------------------------------------------------------------------------------------------------------------------------------------------------|-----------------------------------------------------------------------------------------------------------------------------------|
| 9           | <p>Predictions suggest that deleting exon 9 impacts the secondary structure of at most 4% and the solvent accessibility of at most 13% of remaining residues, if any, as reliability for these predictions are very low or low. Solvent accessibility of NF1delE9 is likely reduced beyond what can be attributed to the deleted exon. 11 out of 13 residues at positions 801-813 are predicted to be ordered (from disordered in full-length NF1). This suggests that the exon deletion could potentially reduce the protein's flexibility in this area, possibly affecting protein function. However, with the exception of one such prediction that has medium reliability, predictions have very low to low reliability. Average Conservation score for this exon is rather moderate at 5.9.</p>                                                                                                                                                                                                                                                                   | <p>Deletion could potentially reduce the protein's flexibility and function</p>                                                   |
| 12          | <p>Predictions suggest that deleting Exon 12 impacts the secondary structure of at most 3% and the solvent accessibility of at most 8% of remaining residues, if any, as reliability for these predictions are very low or low. Solvent accessibility of NF1delE12 may be somewhat reduced beyond what can be attributed to the deleted exon. A 19 residue long sequence, starting with the residue produced by the first codon after the deleted exon, is now predicted to be ordered (from disordered in full-length NF1) - some of these individual predictions have medium reliability. This suggests that the exon deletion could potentially reduce the protein's flexibility in this area, possibly affecting protein function. Average Conservation score for this exon is rather moderate at 4.9.</p>                                                                                                                                                                                                                                                         | <p>Deletion could potentially reduce the protein's flexibility, possibly affecting protein function.</p>                          |
| 17          | <p>Predictions suggest that deleting Exon 17 impacts the secondary structure by at most 2% and the solvent accessibility of at most 7% of remaining residues, if any, as reliability for these predictions are very low or low. NF1delE17's solvent accessibility seems somewhat similar to that of neurofibromin minus the solvent accessibility attributed to amino acids translated from exon 17. Differences in predicted residue order/disorder state are minimal, and all have the lowest reliability score. Average Conservation score for this exon is the lowest of all exons at 1.2.</p>                                                                                                                                                                                                                                                                                                                                                                                                                                                                     | <p>This suggests that the deletion of exon 17 seems to affect the protein's function very little, if at all.</p>                  |
| 18/19       | <p>Predictions suggest that deleting Exons 18/19 impacts the secondary structure of at most 3% of residues. While most predictions have very low or low reliability, four predicted changes have medium (4 or 5) and one has high (6) reliability, out of which those with reliability 5 or higher are found in the CSRD, suggesting that deleting Exons 18/19 affects the structure of the CSRD. It is further predicted that the solvent accessibility of at most 9% of remaining residues changes. Again, the reliabilities of most of these predictions are very low or low, with the exception of one predicted residue, which changed from intermediate to buried and is located in the CSRD. That said, the average solvent accessibility change per residue is roughly zero. Out of 27 residues predicted to change from ordered to disordered, 17 are in a 20-residue long sequence within the CSRD (pos. 796-815 in NF1fl), but prediction reliabilities are all very low or low. Average Conservation scores for both exons are rather moderate at 6.4.</p> | <p>Overall, it appears that the CSRD could be affected by E18/19 deletion. Deletion is predicted to alter secondary structure</p> |

|    |                                                                                                                                                                                                                                                                                                                                                                                                                                                                                                                                                                                                                                                                                                                                                                                                                                                                                       |                                                                                                                                                    |
|----|---------------------------------------------------------------------------------------------------------------------------------------------------------------------------------------------------------------------------------------------------------------------------------------------------------------------------------------------------------------------------------------------------------------------------------------------------------------------------------------------------------------------------------------------------------------------------------------------------------------------------------------------------------------------------------------------------------------------------------------------------------------------------------------------------------------------------------------------------------------------------------------|----------------------------------------------------------------------------------------------------------------------------------------------------|
| 20 | <p>Only 3% of residues are predicted to change their secondary structure. While the majority of predictions has very low or low reliability, 11 predicted changes of residue secondary structure have high or very high reliability. All these residues are located in a 14 residue long subsequence (pos. 804-817) of the CSRD. The same sequence has predicted changes to solvent accessibility and order/disorder status with medium to very high and medium to high reliability, respectively (in total, at most 8% of residues are predicted to have an altered solvent accessibility status). Interestingly, the change of average solvent accessibility per residue is negative, when compared to neurofibromin, implying an increase of solvent accessibility for the remaining residues in NF1del20. Average Conservation score for this exon is rather moderate at 4.5.</p> | <p>In conclusion, the protein structure and conformation could be significantly altered by the deletion of exon 20.</p>                            |
| 21 | <p>5% of residues have a different predicted secondary structure, albeit with low or very low reliability, while for 14% a changed solvent accessibility is predicted, again with low or very low reliability - with one exception: a residue in the CSRD, which is adjacent to the deleted exon sequence. NF1delE21 has likely a reduced overall solvent accessibility, beyond what is attributed to the loss of exon 21. A cluster of eight consecutive residues located in the CSRD at positions 796-803, adjacent to the deleted exon in NF1fl, is predicted to be disordered (compared to ordered in full-length NF1) with medium reliability. Average Conservation score for this exon is rather moderate at 5.2.</p>                                                                                                                                                           | <p>This indicates a potential increase in flexibility in this region of the protein, possibly affecting function.</p>                              |
| 25 | <p>4% of NF1delE25's residues have a different predicted secondary structure, mostly with low or very low reliability (for 3 residues, predicted changes have medium reliability). For 12% of residues a changed solvent accessibility is predicted. The protein's solvent accessibility seems reduced as indicated by the relative high loss of average solvent accessibility per residue, the second highest of all tested proteins with deleted exons. Also, there is a cluster of 11 residues at position 801-813 (in full-length NF1) that is predicted to be ordered, indicating a loss of flexibility. However, prediction reliabilities are very low, which limits the interpretability of these results. Conservation of this exon is quite high with a score of 8.1 suggesting this exon might be essential.</p>                                                            | <p>Conservation of this exon is quite high with a score of 8.1 suggesting this exon might be essential.</p>                                        |
| 28 | <p>NF1 structure is likely significantly affected by exon 28 deletion: 7 predicted changes have medium, 3 have high, and another 8 have very high reliability; and 7 out of those 8 are related to residues in the GRD, while the 8th is for a residue within the Nex-GRDmin-Ces region. We hypothesize that this has a direct negative impact on Ras/Spred1 binding. Moreover, 5 residues are predicted, with medium reliability, to have changed solvent accessibility status, out of which 3 are found in the GRD, one is right outside the GRD and another is in the Tubulin binding domain. NF1delE28's overall solvent accessibility seems slightly reduced, but residues in the GRD seem to be affected the most. Conservation of this exon is high with a score of 8.4 suggesting this exon might be essential.</p>                                                           | <p>We fully anticipate that loss of this exon will result in loss of GRD activity as this exon codes for a known essential portion of the GRD.</p> |
| 36 | <p>All predictions, i.e. changes to secondary structure (4% of residues), solvent accessibility (12% of residues), disorder/order status, and protein binding have low or very low reliability, limiting the interpretability of the data. That said, NF1delE36 has an overall solvent accessibility that is reduced beyond what can be attributed to the loss of exon 36. Also, 11 residues in the CSRD (pos. 801-813) may have changed from disordered to ordered, which would potentially reduce the protein's flexibility. Conservation of this exon is quite high with a score of 7.4 suggesting this exon might be essential.</p>                                                                                                                                                                                                                                               | <p>Conservation of this exon is quite high with a score of 7.4 suggesting this exon might be essential.</p>                                        |

- 41 Only 3% of residues are predicted to have changed their secondary structure. While the majority of predictions have very low or low reliability, 3 predicted changes of residue secondary structure have medium or high reliability (all outside known domains). Also, 8% of residues have been predicted to change their solvent accessibility state, but all predictions have low or very low reliability. Total solvent accessibility of NF1delE41 seems similar to that of neurofibromin, if we disregard the lost solvent accessibility due to the deleted exon. Predictions of changes to the order/disorder status of residues have low or very low reliability and only occur in isolated single or pairs or residues. Conservation of this exon is high with a score of 7.5 suggesting this exon might be essential. Overall, structural changes are likely and conservation of this exon is high with a score of 7.5 suggesting this exon might be essential.
- 47 3% of residues are predicted to have changed their secondary structure. While most predictions have low or very low reliability, 6 predictions have medium and 3 predictions have high reliability (but all these residues are outside any known domain). 10% of residues are predicted to have changed their solvent accessibility state. All predictions except one have low or very low reliability. The average loss of solvent accessibility per residue is the highest of all tested proteins with deleted exon(s). 19 residues within a 30 residue long sequence are predicted to have a change from disordered to ordered, albeit with low reliability. Conservation of this exon is moderate with a score of 6.8 Overall, structural changes are indicated and could in principle impact proper function.
- 52 Only 3% of residues are predicted to have changed their secondary structure. All predictions has very low or low reliability. For 12% of residues a changed solvent accessibility is predicted, but reliabilities are low or very low. There is only a small additional loss of solvent accessibility (on top of the loss due to exon 52 deletion). Predictions of changes to the order/disorder status of residues have low or very low reliability and mostly occur in isolated single or pairs or residues. Conservation of this exon is low with a score of 2.2. Overall, structural changes do not appear to be dramatic. Of concern is the loss of phosphorylation sites as mentioned in the main text: Exon 52 is phosphorylated at T2554 by PKA, which was shown to regulate interaction with 14-3-3 beta (human)<sup>24</sup>, and at Y2556<sup>25</sup>. Loss of NLS is also a concern. Overall, structural changes do not appear to be dramatic, but PTMs and NLS will be lost.

**Supplementary Table 3: Aggregated phenotypic features in probands carrying a truncating NF1 mutation in exon**

| NF1 feature                                                                   | N                                                                               |                                                            |                    |
|-------------------------------------------------------------------------------|---------------------------------------------------------------------------------|------------------------------------------------------------|--------------------|
|                                                                               | Exon 17[12b]                                                                    | Exon 25[19b]                                               | Exon 52[43]        |
| > 5 CALMs                                                                     | 64/66                                                                           | 53/55                                                      | 17/21              |
| Skinfold freckling                                                            | 51/66                                                                           | 46/56                                                      | 10/20 <sup>a</sup> |
| Lisch nodules <sup>A</sup>                                                    | 8/17                                                                            | 11/15                                                      | 1/4                |
| externally visible plexiform neurofibromas <sup>A</sup>                       | 4/28                                                                            | 4/27                                                       | 1/6                |
| externally visible and/or known internal plexiform neurofibromas <sup>A</sup> | 8/28                                                                            | 8/27                                                       | 1/6                |
| Cutaneous neurofibromas <sup>B</sup>                                          | 18/19                                                                           | 10/14                                                      | 4/5                |
| Subcutaneous neurofibromas <sup>B</sup>                                       | 2/8                                                                             | 5/12                                                       | 0/1                |
| symptomatic spinal neurofibromas by MRI                                       | 1/6                                                                             | 2/7                                                        | 2/6                |
| osseous lesions                                                               | 15/64 (including scoliosis, pseudarthrosis, pectus abnormality, pseudarthrosis) | 10/64 (including bone cysts, pseudarthrosis and scoliosis) | 1/21 (scoliosis)   |
| OPGs <sup>C</sup>                                                             | 3/16                                                                            | 4/14                                                       | 1/7 <sup>b</sup>   |
| Other malignant neoplasms <sup>D</sup>                                        | 1/49 <sup>c</sup>                                                               | 1/49 <sup>d</sup>                                          | 0/18               |

A probands aged ≥9 years

B probands aged ≥19 years

C by clinical exam or MRI (symptomatic or asymptomatic)

D not taking into account neurofibromas or optic pathway gliomas

<sup>a</sup> 4/10 individuals with reportedly no skinfold freckling were ≤5 years old

<sup>b</sup> all 7 patients had an MRI and 1 *asymptomatic* OPG was identified

<sup>c</sup> MPNST

<sup>d</sup> adrenal ganglioneuroblastoma

**Supplementary Table 4: Additional Notable Variants in exons 17, 25, and 52 reported in MGL Data set**

Exon 17

In addition to 74 unrelated truncating pathogenic variants, eight different missense variants were observed in exon 17, with three classified as likely benign (p.Ile634Thr, p.His647Tyr and p.Arg659Gln) and five of uncertain significance (p.Asp646Tyr; p.Pro654Ser; p.Leu658Phe; p.Lys662Arg and p.Gly663Arg). Four pathogenic variants in exon 17 are recurrent: c.1885G>A, which results in out of frame missplicing r.1846\_1886del; p.Gln616GlyfrTer4 and is found in 40 unrelated probands, and c.1846C>T, p.Gln616Ter, which was found in three unrelated probands. Furthermore, c.1882delT and c.1882dupT were both observed twice as well (recurrence due to presence of a stretch of 6 T's).

Exon 25

Splicing of exon 25 is complex, as multiple exonic substitutions affect splicing, and substitutions at the canonical AG/GT splice sites lead to activation of cryptic exonic splice donor/acceptor sites and out of frame missplicing. Six probands carry one of two different observed exonic splice variants mimicking a missense variant but leading to out-of-frame missplicing, i.e., c.3277G >A (r.3275\_3314del) and c.3304T>G (r.3304\_3314del); two probands carried an exonic splice variant mimicking a nonsense variant but leading to out-of-frame missplicing, i.e., c.3313A>T (r.3275\_3314del); three probands carried an exonic splice variant mimicking a missense variant but leading to in-frame missplicing, i.e., c.3212C>T (r.3211\_3314del). Fifteen probands carry one of four different splice variants affecting the AG/GT splice sites flanking the exon leading to out-of-frame missplicing (and *not* just in-frame skipping of the exon 25 and therefore also considered truncating variants), i.e., c.3198-2A>G (r.3198\_3199del); c.3198-2A>T (r.3198\_3199del); c.33314+1G>A (r.3275\_3314del) and c.3314+2T>A (r.3275\_3314del).

Exon 52

c.7606C>T, identified in two probands, mimicks a nonsense; and c.7610A>T mimicks a missense, but both lead to out of frame missplicing (r.7605\_7675del71); and c.7675+1del results in out of frame skipping of the last nucleotide (G) of the exon. Another two probands carry the c.7675+1G>A pathogenic variant which results in both in-frame skipping of exon 52 in the majority of transcripts, *and* in-frame insertion of 39 nts from the intron 52, incorporating a premature termination codon (PTC) in a small fraction of the transcripts (r.7675\_7676ins7675+1\_7675+39). (The presence of a PTC suggests that the longer transcript is prone to nonsense mediated decay and may explain why there is less of this transcript.) One >14-<18-year-old proband carrying the c.7675+1G>A presented with <6 CALMs and symptomatic spinal neurofibromas; the second proband presented with ~10 CALMs at the time of testing (<24-months) and his mother (>26-year) had >6 CALMs and bilateral inguinal freckling only.

# Suppl Figure 1: Characterization of Precision Cell Line Models for c.1885G>A in NF1 Exon 17

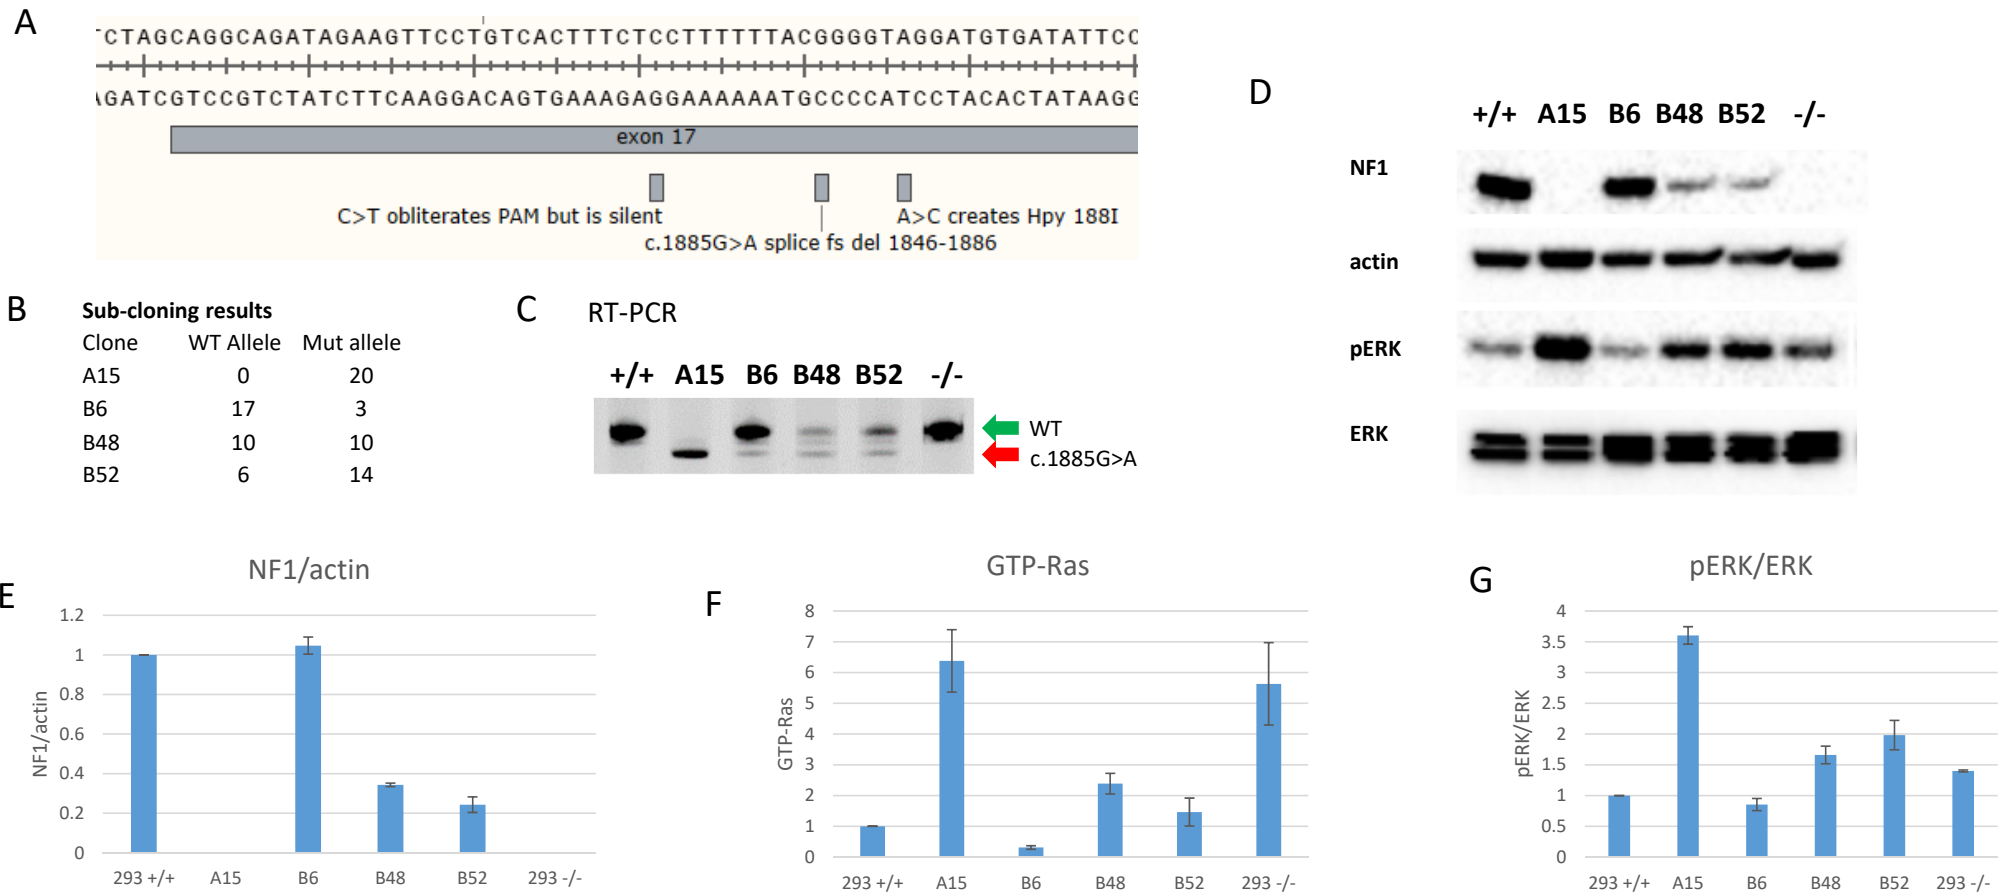



- **Supplementary Figure 1:** Characterization of Precision Cell Line Models for c.1885G>A in NF1 Exon 17 in HEK293 cell lines. A. Diagram depicting wild type genomic sequence surrounding 5' region of NF1 exon 17. Exon 17 is denoted with a gray bar and alterations are indicated with gray rectangles. B. Table summarizing sequencing results from subclones of four different single cell isolates containing c.1885G>A: A15, B6, B48, and B52 indicating various ratios of WT and null alleles. C. RT-PCR products of each cell line displaying both WT allele (denoted with green arrow) and mutant deletion allele (denoted with red arrow) indicating the anticipated altered splicing in variant cell lines in comparison to WT. D. Example Western blots showing representative neurofibromin, actin, pERK, and total ERK expression for each variant cell line indicated in comparison to WT HEK293 cells (+/+) and null HEK293 cells (-/-) where exon 2 has been targeted. E. Quantitation of neurofibromin/actin ratios for the various cell lines. For comparison between cells, WT cells were set at 1 and variant cell lines were normalized based on WT. N=3; error bars represent SEM. F. Quantitation of GTP-Ras level via Ras-GLISA for the various cell lines N=3; error bars represent SEM. For comparison between cells, WT cells were set at 1 and variant cell lines were normalized based on WT GTP-Ras levels. G. Quantitation of pERK/ERK ratios for the various cell lines N=3; error bars represent SEM. Again, WT pERK/ERK ratios were set at 1 and all other lines normalized to WT levels.

Suppl Figure 2: Low magnification (2x) coronal Sections of Brain including (A) Cerebral cortex, (B) Thalamus/hypothalamus, (C) Hippocampus, (D) Cerebellum and brainstem, and (E) Spinal cord (2x magnification) with further definition of subanatomic regions

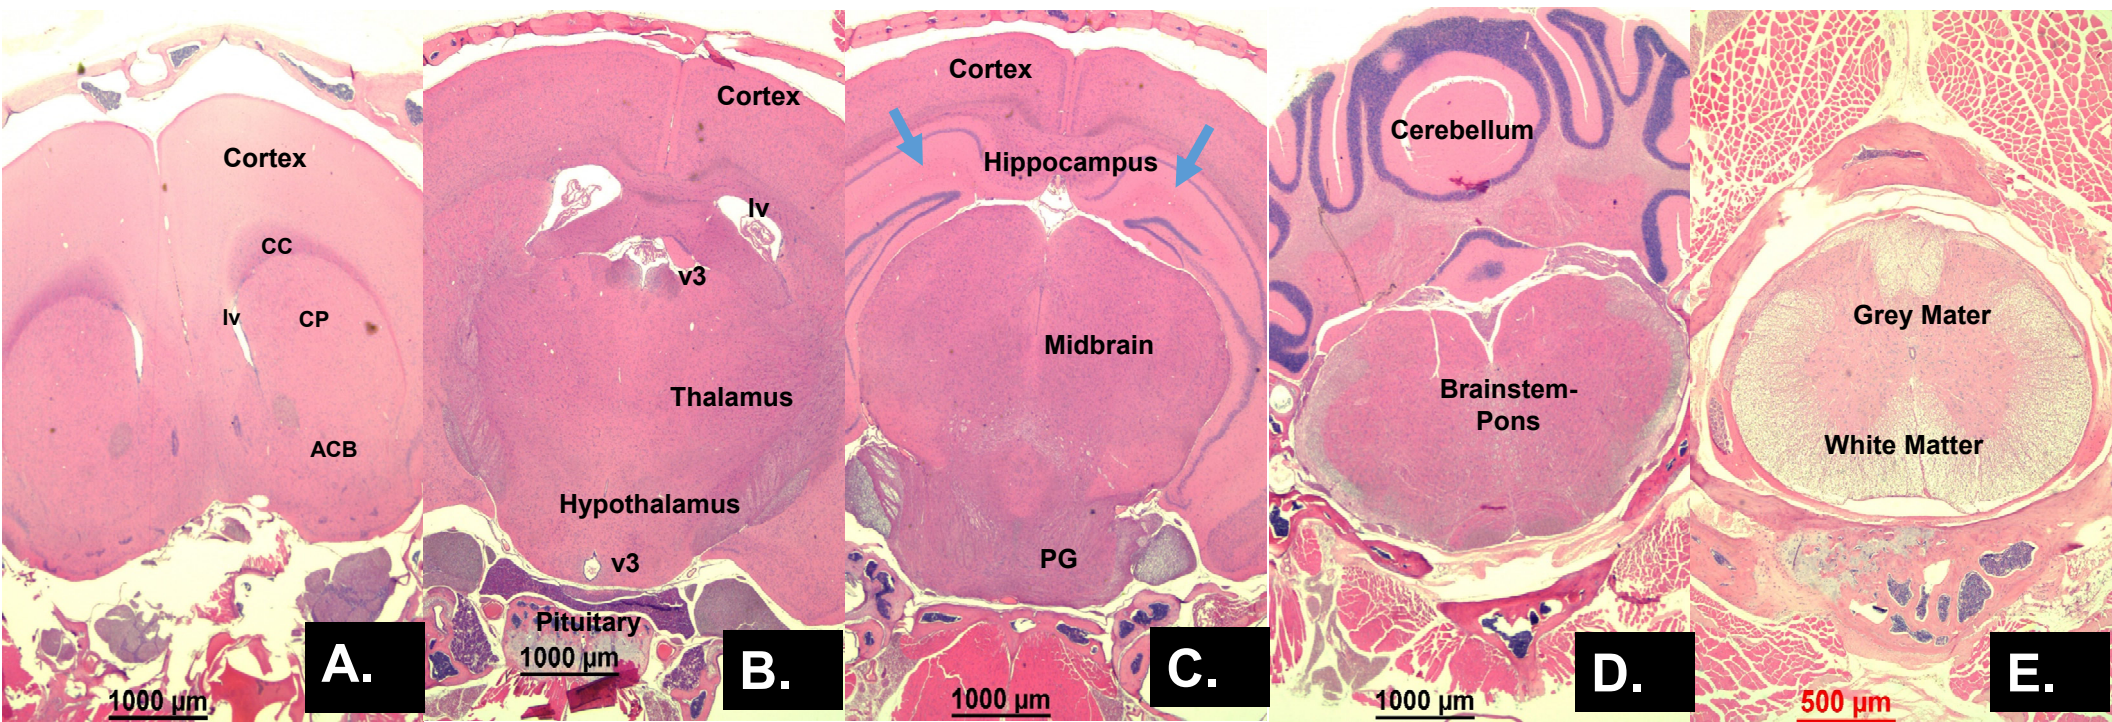

- **Supplementary Figure 2:** Lower magnification coronal sections through the brain reveal no discernable tumor formation or pathology in DelE17 mice. A-E. Coronal sections through the (A) cerebrum, (B) thalamus and hypothalamus, (C) Hippocampus, thalamus, and hypothalamus, (D) cerebellum and brainstem, and (E) spinal cord. All images are 2x magnification with the exception of spinal cord (4x magnification). All sections are representative of CNS histology seen in all 6 mice evaluated.

Suppl Figure 3: Higher magnification (20x) of coronal Sections of (A) Cerebral cortex, (B) Hypothalamus, 3<sup>rd</sup> ventricle, pituitary, (C) Hippocampus, (D) Cerebellum, and (E) Brainstem (20x magnification)

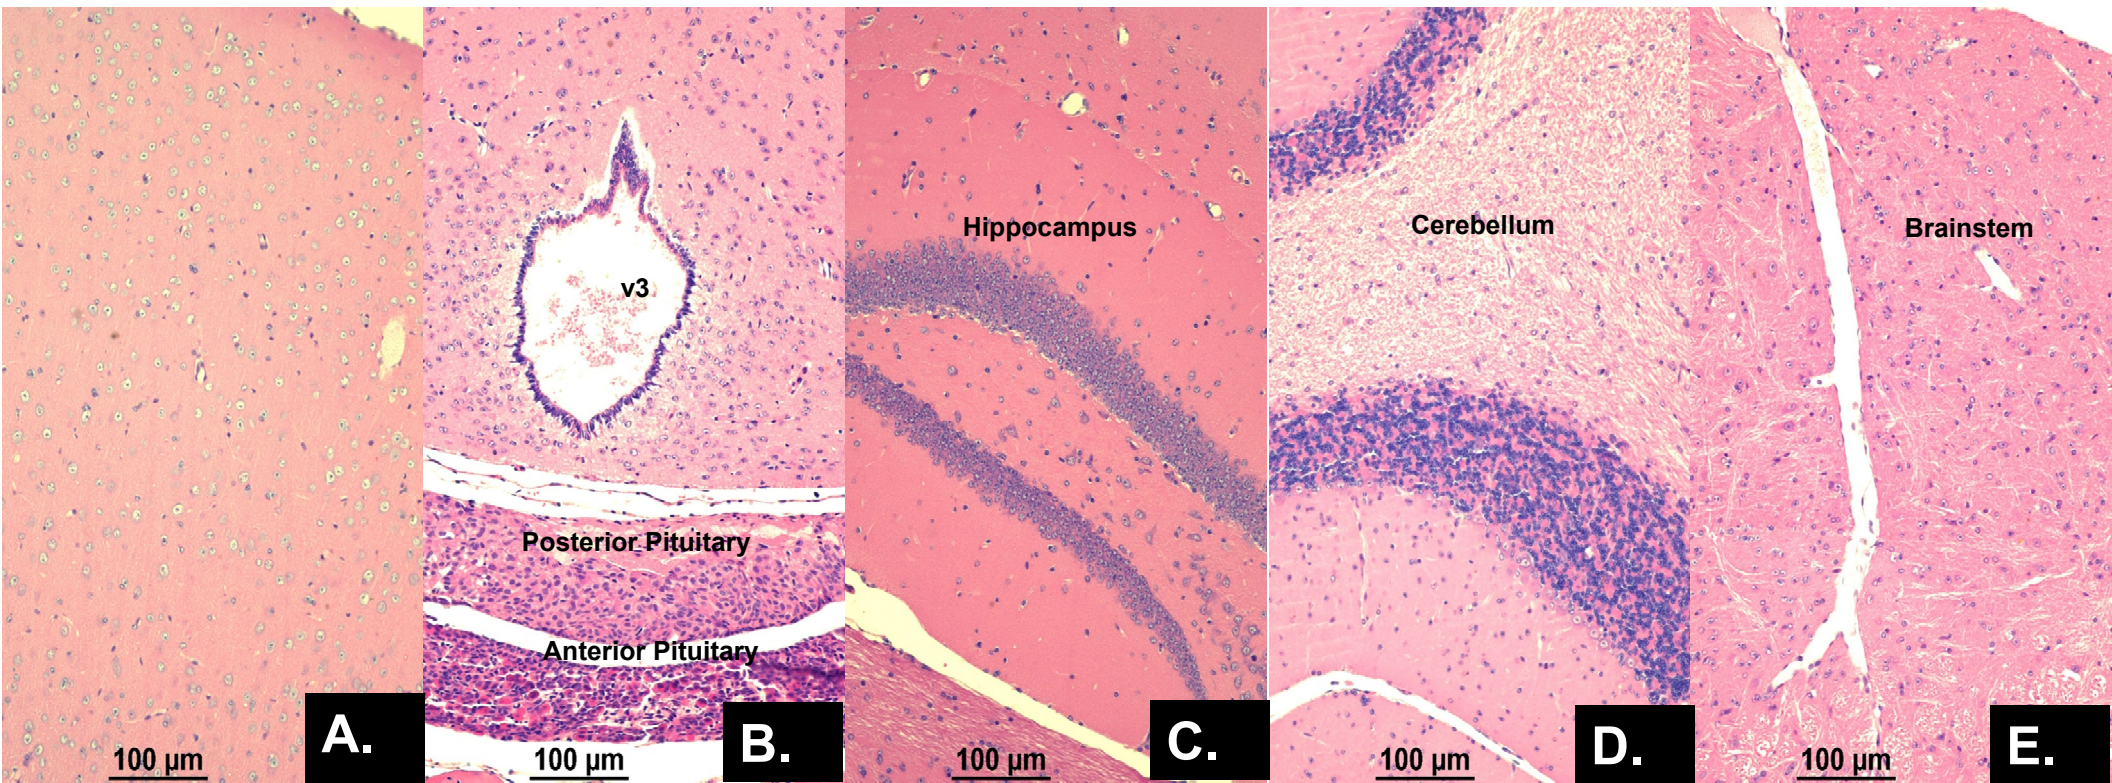

**Supplementary Figure 3:** Higher magnification of coronal sections through the brain reveal no discernable tumor formation or pathology in DelE17 mice. **A-E.** Coronal sections through the (A) cerebrum, (B) hypothalamus and pituitary, (C) Hippocampus, (D) cerebellum, and (E) brainstem. All images are 20x magnification. All sections are representative of CNS histology seen in all 6 mice evaluated.

# Suppl Figure 4: Gross and cellular assessment of thymus, spleen, and lymph nodes in WT and DelE17 mice

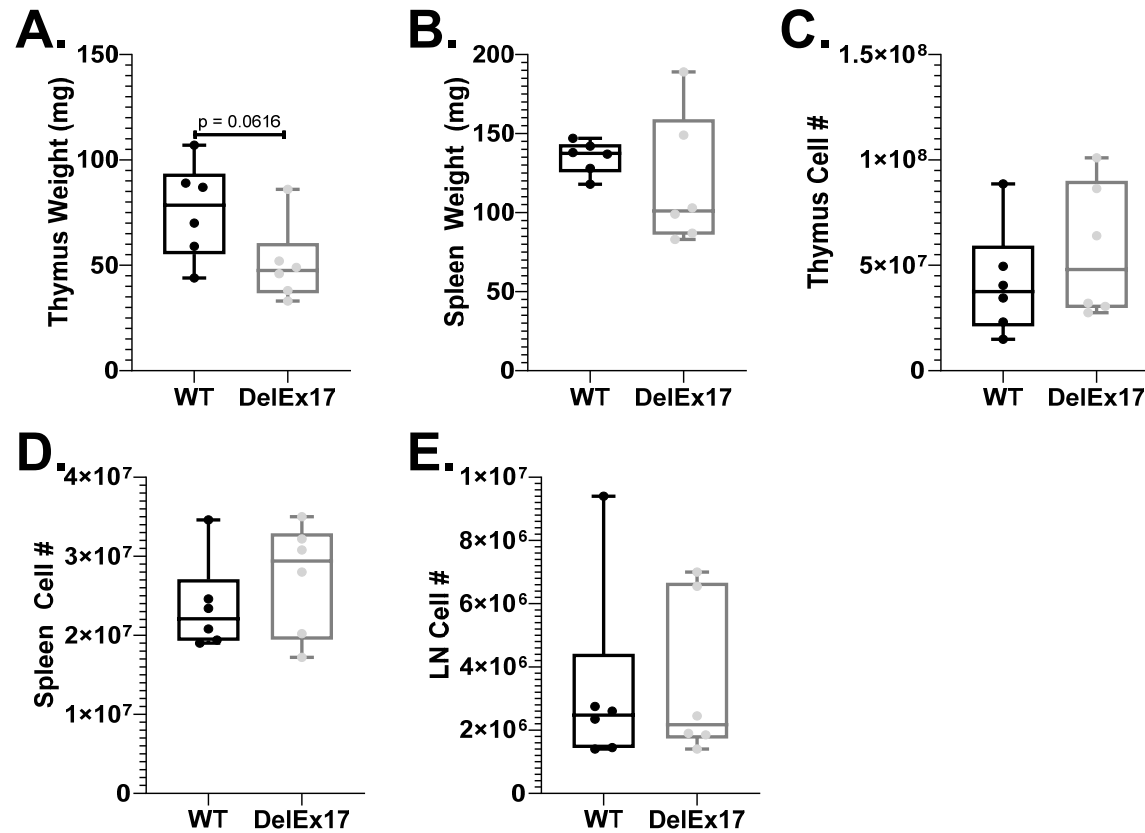

**Supplementary Figure 4:** Gross and cellular assessment of thymus, spleen, and lymph nodes in WT and DelE17 mice. **A.** Thymus and **B.** Spleen weights (mg). **C.** Thymus, **D.** Spleen, **E.** Lymph node cellularity represented as absolute cell numbers.
